1 **Chronic PPAR $\gamma$  Stimulation Shifts Amyloidosis to Higher Fibrillarity**  
2 **but Improves Cognition**

3

4 Tanja Blume<sup>1\*</sup>, Maximilian Deussing<sup>2\*</sup>, Gloria Biechele<sup>2</sup>, Finn Peters<sup>1</sup>, Benedikt Zott<sup>3,4</sup>,  
5 Claudio Schmidt<sup>2</sup>, Nicolai Franzmeier<sup>5</sup>, Karin Wind<sup>1,2</sup>, Florian Eckenweber<sup>2</sup>, Christian  
6 Sacher<sup>2</sup>, Yuan Shi<sup>1</sup>, Katharina Ochs<sup>1</sup>, Gernot Kleinberger<sup>6,7</sup>, Xianyuan Xiang<sup>6</sup>, Carola Focke<sup>2</sup>,  
7 Simon Lindner<sup>2</sup>, Franz-Josef Gildehaus<sup>2</sup>, Leonie Beyer<sup>2</sup>, Barbara von Ungern-Sternberg<sup>2</sup>,  
8 Peter Bartenstein<sup>2</sup>, Karlheinz Baumann<sup>8</sup>, Helmuth Adelsberger<sup>3</sup>, Axel Rominger<sup>9,10</sup>, Paul  
9 Cumming<sup>2,11</sup>, Michael Willem<sup>6</sup>, Mario M. Dorostkar<sup>1,12</sup>, Jochen Herms<sup>1,9,12\*</sup>, Matthias  
10 Brendel<sup>1,2,9\*</sup>

11

12 <sup>1</sup>DZNE – German Center for Neurodegenerative Diseases, Munich, Germany

13 <sup>2</sup>Dept. of Nuclear Medicine, University Hospital of Munich, LMU Munich, Munich, Germany

14 <sup>3</sup>Institute of Neuroscience, Technical University of Munich, Munich, Germany

15 <sup>4</sup>Department of Diagnostic and Interventional Neuroradiology, Klinikum rechts der Isar, Technical  
16 University of Munich, Munich, Germany

17 <sup>5</sup>Institute for Stroke and Dementia Research, University Hospital of Munich, LMU Munich, Munich,  
18 Germany

19 <sup>6</sup>Metabolic Biochemistry, Biomedical Center (BMC), Faculty of Medicine, Ludwig-Maximilians-  
20 Universität München, Munich, Germany

21 <sup>7</sup>ISAR Bioscience GmbH, Planegg, Germany

22 <sup>8</sup>Roche Pharma Research and Early Development, Neuroscience Discovery, Roche, Innovation  
23 Center Basel, F. Hoffmann-La Roche Ltd., Basel, Switzerland

24 <sup>9</sup>SyNergy, University of Munich, Munich, Germany

25 <sup>10</sup>Dept. of Nuclear Medicine, Inselspital Bern, Bern, Switzerland

26 <sup>11</sup>School of Psychology and Counselling, Queensland University of Technology, Brisbane, Australia

27 <sup>12</sup>Center for Neuropathology and Prion Research, Ludwig-Maximilians-University of Munich, Munich,  
28 Germany

29

30 \*contributed equally

31

32 04/10/2021

33

34 **Running title:** Improved cognition despite enhanced fibrillar A $\beta$

35 **Keywords:** pioglitazone; A $\beta$ -PET; *App*<sup>NL-G-F</sup> mice; PS2APP mice; microglia; A $\beta$ -plaque  
36 composition

37 **Word count (body):** 3996

38

39 **Corresponding author:**

40 Dr. Matthias Brendel, MHBA

41 Department of Nuclear Medicine

42 University Hospital of Munich, Marchioninstr.15, 81377 Munich, Germany

43 Phone: +49 (0) 89 4400 74650

44 Fax: +49 (0) 89 4400 77646

45 E-Mail: matthias.brendel@med.uni-muenchen.de

1 **Abstract**

2 **Background:** We undertook longitudinal  $\beta$ -amyloid positron emission tomography (A $\beta$ -PET)  
3 imaging as a translational tool for monitoring of chronic treatment with the peroxisome  
4 proliferator-activated receptor gamma (PPAR $\gamma$ ) agonist pioglitazone in A $\beta$  model mice. We  
5 thus tested the hypothesis this treatment would rescue from increases of the A $\beta$ -PET signal  
6 while promoting spatial learning and preservation of synaptic density.

7

8 **Methods:** PS2APP mice (N=23; baseline age: 8 months) and *App*<sup>NL-G-F</sup> mice (N=37; baseline  
9 age: 5 months) were investigated longitudinally for five months using A $\beta$ -PET. Groups of  
10 mice were treated with pioglitazone or vehicle during the follow-up interval. We tested spatial  
11 memory performance and confirmed terminal PET findings by immunohistochemical and  
12 biochemistry analyses.

13

14 **Results:** Surprisingly, A $\beta$ -PET and immunohistochemistry revealed a shift towards higher  
15 fibrillary composition of A $\beta$ -plaques during upon chronic pioglitazone treatment. Nonetheless,  
16 synaptic density and spatial learning were improved in transgenic mice with pioglitazone  
17 treatment, in association with the increased plaque fibrillarity.

18

19 **Conclusion:** These translational data suggest that a shift towards higher plaque fibrillarity  
20 protects cognitive function and brain integrity. Increases in the A $\beta$ -PET signal upon  
21 immunomodulatory treatments targeting A $\beta$  aggregation can thus be protective.

22

## 1        **1. Introduction**

2        Alzheimer's disease (AD) has become the most common cause of dementia, and is imposing  
3        a significant burden on health care systems of societies with aging populations (1). During  
4        the past few decades, research on AD pathogenesis led to the formulation of a model that  
5        accumulation of amyloid beta (A $\beta$ )-plaques and neurofibrillary tangles, the histologically  
6        characterizing hallmarks of AD (2), triggers a cascade of neurodegenerative events, leading  
7        to disease progression (3). Additionally, novel emerging evidence indicates that  
8        neuroinflammation plays an important role in pathogenesis and progression of AD and many  
9        other neurodegenerative diseases (4; 5). In AD, activated microglial cells are able to bind  
10       and phagocytize soluble A $\beta$ , and to some degree also the fibrillary A $\beta$  aggregates, as part of  
11       the increased inflammatory response (4). However, others report that A $\beta$ -recognition  
12       receptors on microglia downregulate during the progression of AD, such that microglial cells  
13       eventually undergo senescence, characterized by reduced phagocytosis of A $\beta$ -aggregates  
14       (7). With time, the decreased microglial activity is permissive to expansion of fibrillar  
15       amyloidosis (8; 9) and a high proportion of dystrophic microglia were observed in human AD  
16       brain *post mortem* (11). These observations have led some to speculate that the microglial  
17       response is overwhelmed by the massive A $\beta$ -deposition occurring in advanced AD, such that  
18       their chronic activation has a detrimental impact on disease progression (12; 7).

19       It might follow that treatment with anti-inflammatory drugs should alleviate AD progression.  
20       Pioglitazone is an anti-inflammatory insulin sensitizer widely used to treat hyperglycemia in  
21       type 2 diabetes via activation of peroxisome proliferator-activated receptor gamma (PPAR- $\gamma$ ).  
22       Treatment with pioglitazone enables microglial cells to undergo a phenotypic conversion from  
23       a pro-inflammatory towards an anti-inflammatory and neuroprotective phenotype (14; 15).  
24       Furthermore, activation of PPAR- $\gamma$  in the brains of AD mice initiate a coupled metabolic cycle  
25       with the Liver X Receptor to increase brain apolipoprotein E levels, which promotes the  
26       ability of microglial cells to phagocyte and degrade both soluble and fibrillary A $\beta$  (14; 15).  
27       However, another study showed that only low-dose PPAR- $\gamma$  agonist treatment, but not the  
28       conventional doses, promotes an A $\beta$ -clearing effect by increasing (LDL Receptor Related

1 Protein 1 (LRP1) in human brain microvascular endothelial cells (HBMECs) (16). Despite this  
2 compelling preclinical evidence, a meta-analysis encompassing nine clinical studies did not  
3 compelling support a beneficial effect of PPAR- $\gamma$  agonist treatment on cognition and memory  
4 in in patients with mild-to-moderate AD (18). Furthermore, a phase III trial of pioglitazone in  
5 patients with mild AD was discontinued due to lacking efficacy (19). It remains a conundrum  
6 why the translation of PPAR $\gamma$  stimulation into human AD failed, which calls for further  
7 investigation to uncover the basis of the seemingly false lead. Conceivably, the efficacy of  
8 pioglitazone may be confined to a specific stage of AD, or in cases distinguished by a  
9 particular biomarker.

10 Given this background, we hypothesized that A $\beta$ -load and composition would determine the  
11 individual efficacy of PPAR $\gamma$  stimulation effect in the progression of AD mouse models.  
12 Therefore, we undertook serial small animal positron emission tomography ( $\mu$ PET) with the  
13 A $\beta$ -tracer [ $^{18}$ F]florbetaben (20–22) in two AD mouse models with distinct A $\beta$ -plaque  
14 composition. The transgenic PS2APP-line develops dense fibrillary A $\beta$ -plaques with late  
15 debut whereas the knock-In mouse model *App*<sup>NL-G-F</sup> develops more diffuse oligomeric A $\beta$ -  
16 plaques with early debut. Both strains of mice were treated with pioglitazone or vehicle for  
17 five months during the phase of main A $\beta$  accumulation. We conducted behavioral  
18 assessments of spatial learning and confirmed longitudinal PET findings by  
19 immunohistochemical analysis and biochemical analysis, thus aiming to test the hypothesis  
20 that response to pioglitazone would depend on the type of A $\beta$ -plaques formed in transgenic  
21 mice.

22

23

24

25

26

27

28

1

2

## 3 **2. Methods and Materials**

### 4 **Study design**

5 Groups of PS2APP and *App*<sup>NL-G-F</sup> mice were randomized to either treatment (PS2APP-PIO  
6 N=13; *App*<sup>NL-G-F</sup>-PIO N=14) or vehicle (PS2APP-VEH N=10; *App*<sup>NL-G-F</sup>-VEH N=23) groups at  
7 the age of 8 (PS2APP) and 5 (*App*<sup>NL-G-F</sup>) months. In PS2APP mice, the baseline  
8 [<sup>18</sup>F]florbetaben-PET scan (Aβ-PET) was performed at the age of eight months, followed by  
9 initiation of pioglitazone treatment or vehicle for a period of five months and a follow-up Aβ-  
10 PET scan at 13 months. In *App*<sup>NL-G-F</sup> mice, the baseline Aβ-PET scan was performed at the  
11 age of five month, followed by initiation of pioglitazone treatment or vehicle, for a period of  
12 five months. Follow-up Aβ-PET scans were acquired at 7.5 months and ten months of age,  
13 which was the study termination in *App*<sup>NL-G-F</sup> mice. For all mice, behavioral testing after the  
14 terminal PET scan was followed by immunohistochemical and biochemical analyses of  
15 randomized hemispheres. The TSPO-PET arm of the study and detailed analyses of  
16 neuroinflammation imaging are reported in a separate manuscript focusing on the predictive  
17 value of TSPO-PET for outcome of PPARγ-related immunomodulation (23). The sample size  
18 estimation of the in vivo PET study was based on previous experience and calculated by  
19 G\*power (V3.1.9.2, Kiel, Germany), assuming a type I error α=0.05 and a power of 0.8 for  
20 group comparisons, a 10% drop-out rate per time-point (including TSPO-PET), and a  
21 treatment effect of 5% change in the PET signal (23). Shared datapoints between the study  
22 arms are indicated.

23

### 24 **Animals**

25 PS2APP transgenic (24), *App*<sup>NL-G-F</sup> APP knock-in (25) and wild-type C57Bl/6 mice were used  
26 in this investigation (for details see Supplement). All experiments were performed in  
27 compliance with the National Guidelines for Animal Protection, Germany, with approval of the  
28 local animal care committee of the Government of Oberbayern (Regierung Oberbayern) and

1 overseen by a veterinarian. The experiments complied with the ARRIVE guidelines and were  
2 carried out in accordance with the U.K. Animals (Scientific Procedures) Act, 1986 and  
3 associated guidelines, EU Directive 2010/63/EU for animal experiments. Animals were  
4 housed in a temperature and humidity-controlled environment with a 12-h light–dark cycle,  
5 with free access to food (Ssniff) and water.

6

### 7 **A $\beta$ -PET Acquisition and Reconstruction**

8 [ $^{18}\text{F}$ ]florbetaben radiosynthesis was performed as previously described (22). This procedure  
9 yielded a radiochemical purity exceeding 98% and a specific activity of  $80\pm 20$  GBq/ $\mu\text{mol}$  at  
10 the end of synthesis. Mice were anesthetized with isoflurane (1.5%, delivered via a mask at  
11 3.5 L/min in oxygen) and received a bolus injection [ $^{18}\text{F}$ ]florbetaben  $12\pm 2$  MBq in 150  $\mu\text{L}$  of  
12 saline to a tail vein. Following placement in the tomograph (Siemens Inveon DPET), a single  
13 frame emission recording for the interval 30-60 min p.i., which was preceded by a 15-min  
14 transmission scan obtained using a rotating [ $^{57}\text{Co}$ ] point source. The image reconstruction  
15 procedure consisted of three-dimensional ordered subset expectation maximization (OSEM)  
16 with four iterations and twelve subsets followed by a maximum *a posteriori* (MAP) algorithm  
17 with 32 iterations. Scatter and attenuation correction were performed and a decay correction  
18 for [ $^{18}\text{F}$ ] was applied. With a zoom factor of 1.0 and a 128x128x159 matrix, a final voxel  
19 dimension of 0.78x0.78x0.80 mm was obtained.

20

### 21 **Small-Animal PET Data Analyses**

22 Volumes of interest (VOIs) were defined on the MRI mouse atlas (26). A forebrain target VOI  
23 ( $15\text{ mm}^3$ ) was used for group comparisons and an additional hippocampal target VOI ( $8$   
24  $\text{mm}^3$ ) served for correlation analysis with spatial learning. We calculated [ $^{18}\text{F}$ ]florbetaben  
25 standard-uptake-value ratios (SUVRs) using the established white matter (PS2APP;  $67\text{ mm}^3$ ;  
26 pons, midbrain, hindbrain and parts of the subcortical white matter) and periaqueductal grey  
27 ( $App^{NL-G-F}$ ;  $20\text{ mm}^3$ ) reference regions (27–29).

28

## 1 **Water Maze**

2 Two different water maze tasks were applied due to changing facilities between the  
3 investigations of PS2APP and *App*<sup>NL-G-F</sup> cohorts. We used a principal component analysis of  
4 the common read outs of each water maze task to generate a robust index for correlation  
5 analyses in individual mice (30). The principal component of the water maze test was  
6 extracted from three spatial learning read-outs (PS2APP: escape latency, distance, platform  
7 choice; *App*<sup>NL-G-F</sup>: escape latency, frequency to platform, time spent in platform quadrant).  
8 Thus, one quantitative index of water maze performance per mouse was generated for  
9 correlation with PET imaging readouts. The experimenter was blind to the phenotype of the  
10 animals.

11 *Water Maze in PS2APP mice*: PS2APP and age-matched wild-type mice were subjected to a  
12 modified Morris water maze task as described previously (31–34) yielding escape latency,  
13 distance to the correct platform and correct choice of the platform as read-outs.

14 *Water Maze in *App*<sup>NL-G-F</sup> mice*: *App*<sup>NL-G-F</sup> mice (treated and vehicle) and 14 age- and sex-  
15 matched wild-type mice (vehicle) underwent a classical Morris water maze test, which was  
16 performed according to a standard protocol with small adjustments (35) as previously  
17 described (29). Details are provided in the Supplement.

18

## 19 **Immunohistochemistry**

20 Immunohistochemistry in brain regions corresponding to PET analyses was performed for  
21 fibrillary as well as oligomeric A $\beta$ , microglia and synaptic density as previously published  
22 (36–38). We obtained immunofluorescence labelling of oligomeric A $\beta$  using NAB228  
23 (Thermo Fisher Scientific, USA) with a dilution of 1:500. For histological staining against  
24 fibrillar A $\beta$ , we used methoxy-X04 (TOCRIS, Bristol, United Kingdom) at a dilution of 0.01  
25 mg/ml in the same slice as for NAB228 staining. We obtained immunofluorescence labelling  
26 of microglia using an Iba-1 antibody (Wako, Richmond, USA) with a dilution of 1:200 co-  
27 stained with CD68 (BioRad, California, USA) with a dilution of 1:100. The synaptic density  
28 was measured using an anti-vesicular glutamate transporter 1 (VGLUT1) primary antibody

1 (1:500, MerckMillipore). Quantification was calculated as area-%. Details are provided in the  
2 Supplement.

3

#### 4 **Biochemical characterization of brain tissue**

5 DEA (0,2% Diethylamine in 50 mM NaCl, pH 10) and RIPA lysates (20 mM Tris-HCl (pH 7.5),  
6 150 mM NaCl, 1 mM Na<sub>2</sub>EDTA, 1% NP-40, 1% sodium deoxycholate, 2.5 mM sodium  
7 pyrophosphate) were prepared from brain hemispheres. The later was centrifuged at 14,000  
8 g (60 min at 4°C) and the remaining pellet was homogenized in 70% formic acid (FA  
9 fraction). The FA fraction was neutralized with 20 x 1 M Tris-HCl buffer at pH 9.5 and used  
10 further diluted for A $\beta$  analysis. A $\beta$  contained in FA fractions was quantified by a sandwich  
11 immunoassay using the Meso Scale A $\beta$  Triplex plates and Discovery SECTOR Imager 2400  
12 as described previously (39). Samples were measured in triplicates.

13

#### 14 **Statistics**

15 The principal component of the water maze test was extracted using SPSS 26 statistics (IBM  
16 Deutschland GmbH, Ehningen, Germany). Prior to the PCA, the linear relationship of the  
17 data was tested by a correlation matrix and items with a correlation coefficient <0.3 were  
18 discarded. The Kaiser-Meyer-Olkin (KMO) measure and Bartlett's test of sphericity were  
19 used to test for sampling adequacy and suitability for data reduction. Components with an  
20 Eigenvalue >1.0 were extracted and a varimax rotation was selected. Water maze results  
21 were also used as an endpoint in the dedicated manuscript on serial TSPO-PET in both  
22 cohorts (23). For immunohistochemistry quantifications GraphPad Prism (Graphpad Prism 7  
23 Software, USA) was used. All analyses were performed by an operator blinded to the  
24 experimental conditions. Data were normally distributed according to Shapiro-Wilk or  
25 D'Agostino-Pearson test. One-way analysis of variance (ANOVA) including Bonferroni post  
26 hoc correction was used for group comparisons > 2 subgroups. For assessment of inter-  
27 group differences at single time points, Student's t-test (unpaired, two-sided) was applied. All  
28 results are presented as mean  $\pm$  SEM. P values <0.05 are defined as statistically significant.



1  
2  
3  
4  
5  
6  
7  
8  
9  
10  
11  
12  
13  
14  
15  
16  
17  
18  
19  
20  
21  
22  
23  
24  
25  
26  
27  
28  
9

### 3. Results

#### Long-term pioglitazone treatment provokes a significant increase of the A $\beta$ -PET signal in PS2APP mice

First, we analyzed serial changes of fibrillar amyloidosis under chronic pioglitazone treatment by [ $^{18}$ F]florbetaben A $\beta$ -PET in PS2APP mice and wild-type controls. Vehicle treated PS2APP mice showed an elevated A $\beta$ -PET SUVR when compared to vehicle treated wild-type at eight (+20.4%,  $p < 0.0001$ ) and 13 months of age (+37.9%,  $p < 0.0001$ ). As expected, the A $\beta$ -PET SUVR of wild-type mice did not change between eight and 13 months of age ( $0.831 \pm 0.003$  vs.  $0.827 \pm 0.008$ ;  $p = 0.645$ ). Surprisingly, pioglitazone treatment provoked a stronger longitudinal increase in the A $\beta$ -PET signal of PS2APP mice (+21.4%) when compared to vehicle treated PS2APP mice (+14.1%,  $p = 0.002$ ). At the follow-up time point, the A $\beta$ -PET SUVR was significantly elevated when compared to untreated PS2APP mice (Fig. 1;  $1.140 \pm 0.014$  vs.  $1.187 \pm 0.011$ ;  $p = 0.0017$ ). Pioglitazone treatment in wild-type mice provoked no changes of A $\beta$ -PET SUVR compared to vehicle-treated wild-type mice at the follow-up time-point ( $0.827 \pm 0.008$  vs.  $0.823 \pm 0.005$ ;  $p = 0.496$ ). Taken together, we found a significant increase in the A $\beta$ -PET signal, which implied an increase in fibrillary A $\beta$ -levels under pioglitazone treatment in PS2APP mice.

#### A $\beta$ -PET detects a strong increase of the fibrillar A $\beta$ -load in *App*<sup>NL-G-F</sup> mice during chronic PPAR $\gamma$ stimulation

Next, we sought to validate our unexpected findings in PS2APP mice a mouse model with differing A $\beta$  plaque composition, namely the *App*<sup>NL-G-F</sup> mouse, which has limited fibrillarity due to endogenous expression of APP with three FAD mutations (25). Strikingly, the effect of pioglitazone treatment on the A $\beta$ -PET signal was even stronger in *App*<sup>NL-G-F</sup> mice than in

1 PS2APP mice. There was a pronounced increase of the A $\beta$ -PET signal during chronic  
2 pioglitazone treatment (+17.2%) compared to vehicle (+5.3%,  $p < 0.0001$ ). *App*<sup>NL-G-F</sup> mice with  
3 pioglitazone treatment had a higher A $\beta$ -PET SUVR at 7.5 (+4.6%,  $p = 0.0071$ ) and ten  
4 (+7.7%,  $p < 0.0001$ ) months of age when compared to vehicle-treated *App*<sup>NL-G-F</sup> mice (Fig. 2).  
5 The baseline level of A $\beta$ -PET SUVR was non-significantly lower in treated compared to  
6 untreated *App*<sup>NL-G-F</sup> mice ( $0.878 \pm 0.010$  vs.  $0.906 \pm 0.006$ ,  $p = 0.1350$ ). In both mouse models,  
7 the A $\beta$ -signal increase after pioglitazone-treatment compared to baseline scans was  
8 pronounced in the frontotemporal cortex and hippocampal area (Figs. 1A & 2A). In summary,  
9 the pioglitazone treatment augmented the A $\beta$ -PET signal increase in both mouse models;  
10 this unexpected result was more pronounced in the *App*<sup>NL-G-F</sup> model, which expresses less  
11 fibrillary A $\beta$  plaques.

12

### 13 **Pioglitazone triggers a shift towards increased A $\beta$ -plaque fibrillarity in two distinct** 14 **mouse models of amyloidosis**

15 Given the unexpected *in vivo* findings, we set about to evaluate the molecular correlates of  
16 the potentiation of A $\beta$ -PET signal during pioglitazone treatment in AD model mice. The  
17 (immuno)histochemical analysis showed that the observed increase of the A $\beta$ -PET signal  
18 was predominantly explicable by a change in plaque composition rather than by a change in  
19 plaque density (Fig. 3). In both mouse models, the proportion of fibrillary A $\beta$  stained with  
20 methoxy-X04 increased significantly under pioglitazone treatment compared to vehicle  
21 treated animals (PS2APP:  $29.6 \pm 3.5\%$  vs.  $15.2 \pm 0.7\%$ ,  $p = 0.0056$ , Fig. 3C; *App*<sup>NL-G-F</sup>:  $9.1 \pm 1.6\%$   
22 vs.  $4.4 \pm 0.4\%$ ,  $p = 0.0001$ , Fig. 3D). Pioglitazone treatment had no significant effect on the  
23 proportion of oligomeric A $\beta$  stained with NAB228 in PS2APP mice (PS2APP:  $65.4 \pm 6.1\%$  vs.  
24  $67.0 \pm 6.9\%$ ,  $p = 0.865$ , Fig. 3C). In *App*<sup>NL-G-F</sup> mice, however, the proportion of oligomeric A $\beta$   
25 decreased significantly in treated animals (*App*<sup>NL-G-F</sup>:  $26.7 \pm 1.7\%$  vs.  $34.5 \pm 1.7\%$ ,  $p = 0.0138$ ,  
26 Fig. 3E). The effect size of pioglitazone treatment on plaque morphology was larger in *App*<sup>NL-</sup>  
27 <sup>G-F</sup> mice than in PS2APP mice, which was reflected by a significantly increased overlay of  
28 methoxy-X04 and NAB228 positive plaques proportions in relation to untreated mice

1 (PS2APP: 40.4±3.6% vs. 25.1±2.1%, p=0.0075, Fig. 3C; *App*<sup>NL-G-F</sup>: 35.0±3.4% vs.  
2 12.9±1.3%, p=0.0005, Fig. 3E). We attribute this effect to the generally diffuse nature of the  
3 plaque composition of *App*<sup>NL-G-F</sup> mice, which predominantly contain high oligomeric and low  
4 fibrillary fractions of Aβ (40) (compare Fig. 3A and Fig. 3B).

5 The number of methoxy positive Aβ-plaques were similar between vehicle and pioglitazone  
6 treated groups for PS2APP (1016±107 vs. 1118±121, p=0.547, Fig. 3D) and *App*<sup>NL-G-F</sup> mice  
7 (242±56 vs. 266±33, p=0.722, Fig. 3F). Notably there was no significant effect of chronic  
8 pioglitazone treatment on the different insoluble Aβ species (Aβ40, Aβ42) as well as on the  
9 level of the soluble Aβ42-isoform observed in either mouse model (Suppl. Fig. 1A). Taken  
10 together, our results indicate that the potentiated increase of the Aβ-PET signal upon  
11 pioglitazone treatment reflected a change in plaque composition from oligomeric to fibrillary  
12 Aβ-fractions.

13

#### 14 **Microglial activation is reduced upon PPAR $\gamma$ stimulation in both AD mouse models**

15 To confirm changes in the activation state of microglial cells, we performed Iba1 as well as  
16 CD68 immunohistochemical staining of activated microglia in both mouse models. We  
17 observed that pioglitazone treatment significantly decreased microglial activation in both  
18 mouse models (Fig. 4). In PS2APP mice, PPAR $\gamma$  stimulation provoked a one-third reduction  
19 of area coverage of Iba1-positive microglial cells (area: 9.1±0.6%) compared to untreated  
20 mice (14.0±0.5%, p=0.0003), and also a significant reduction of CD68-positive microglial  
21 cells area (7.6±0.4% vs. 9.9±0.3%, p=0.0018). In pioglitazone treated *App*<sup>NL-G-F</sup> mice, the  
22 area reduction was less pronounced, but still significant for Iba1-positive microglial cells  
23 (9.4±0.2% vs. 10.6±0.2%, p=0.0015) and CD68-positive microglial cells (2.7±0.1% vs.  
24 3.0±0.1%, p=0.0141) compared to untreated mice. Thus, we observed a consistent net  
25 reduction of activated microglial coverage in both models; the lesser effect in *App*<sup>NL-G-F</sup> mice  
26 might indicate partial compensation by triggering of microglial activation due to increased  
27 fibrillary Aβ levels (40).

28

1 **Cognitive function is improved by chronic pioglitazone treatment in association with**  
2 **an increasing A $\beta$ -PET rate of change**

3 Finally, we aimed to elucidate whether the observed longitudinal changes in the composition  
4 of A $\beta$ -plaques affected synaptic density and hippocampus related cognitive performance.

5 In PS2APP mice, treatment with pioglitazone resulted in a significant reduction of the water  
6 maze performance index compared to untreated mice during the probe trial (Fig. 5A;  
7  $p=0.0155$ ), whereas in wild-type animals there was no difference between treated and  
8 untreated animals ( $p>0.999$ ). The water maze performance index of pioglitazone treated  
9 PS2APP mice correlated strongly with the rate of increase in A $\beta$ -PET signal (Fig. 5C;  
10  $R=0.686$ ;  $p=0.0097$ ). In *App*<sup>NL-G-F</sup> mice, pioglitazone treatment did not result in a significant  
11 change of spatial learning performance (Fig. 5B;  $p>0.999$ ). Accordingly, the water maze  
12 performance index and the rate of change in the A $\beta$ -PET signal of pioglitazone treated *App*<sup>NL-</sup>  
13 <sup>G-F</sup> mice did not correlate significantly (Fig. 5D;  $R=0.341$ ;  $p=0.254$ ). There was no significant  
14 association between the water maze performance index and the A $\beta$ -PET rate of change in  
15 vehicle treated PS2APP or *App*<sup>NL-G-F</sup> mice.

16 To explore the basis of water maze results in PS2APP mice at the molecular level, we  
17 performed staining of synaptic density in the hippocampus. A $\beta$ -oligomers are the primary  
18 neurotoxic forms of A $\beta$ , while A $\beta$ -fibrils have less neurotoxicity (44–46). Thus, we  
19 hypothesized that pre-synaptic density in the hippocampal CA1-Area would be rescued upon  
20 pioglitazone-treatment. In wild-type mice we did not observe altered changed VGLUT1  
21 density under pioglitazone treatment (Fig. 5E, F;  $0.519\pm 0.007$  1/ $\mu\text{m}$  vs.  $0.502\pm 0.008$  1/ $\mu\text{m}$ ,  
22  $p=0.810$ ). In PS2APP mice, however, we found that pioglitazone treatment significantly  
23 rescued spine density in the CA1-region of the hippocampus compared to untreated animals  
24 (Fig. 5E, F;  $0.497\pm 0.006$  1/ $\mu\text{m}$  vs.  $0.459\pm 0.007$  1/ $\mu\text{m}$ ,  $p=0.0012$ ), supporting the  
25 hippocampal-dependent water maze results.

26

27

28

1

2

3

#### 4 **4. Discussion**

5 To our knowledge, this is the first large-scale longitudinal PET study of cerebral A $\beta$ -  
6 deposition in two distinct AD mouse models treated with the PPAR $\gamma$  agonist pioglitazone. We  
7 combined *in vivo* PET monitoring with behavioral testing and detailed immunohistochemical  
8 analysis. Our main finding was an unexpected potentiation in both mouse models of the  
9 increasing A $\beta$ -PET signal during five months of pioglitazone treatment. This increase  
10 occurred despite an improvement of spatial learning and prevention of synaptic loss in the  
11 treated mice. Immunohistochemistry revealed a shift towards plaque composition of higher  
12 fibrillarity as the molecular correlate of the A $\beta$ -PET signal, which was directly associated with  
13 improved cognitive performance in PS2APP mice.

14 A $\beta$ -PET enables longitudinal *in vivo* detection of A $\beta$ -plaques, which plays an important role in  
15 AD diagnosis, monitoring disease progression, and as an endpoint for therapeutic treatment  
16 effects (47). In our preceding observational and interventional studies, we validated in AD  
17 model mice the clinically established A $\beta$ -PET tracer [ $^{18}$ F]florbetaben relative to histologically  
18 defined indices A $\beta$  deposition (3; 21). So far, an enhanced or increasing [ $^{18}$ F]florbetaben-PET  
19 signal has been interpreted as an indicator of disease progression or treatment failure (48).  
20 Unexpectedly, we found that pioglitazone potentiated the increasing A $\beta$ -PET signal in two  
21 mouse models compared to vehicle controls; in both cases, this increase was due to a shift  
22 of the plaque composition towards higher fibrillarity, and away from the more neurotoxic  
23 oligomeric form. However, ELISA measurements of plaque associated fibrillary A $\beta$   
24 extracted with formic acid did not indicate a change in the A $\beta$  species composition in brain.  
25 This suggests that A $\beta$ -PET imaging and immunohistochemical analysis detect treatment  
26 effects on A $\beta$ -plaque composition that do not arise from a shift in the levels of A $\beta$  species,  
27 and which may thus evade detection in studies of CSF or plasma content (49).

28 Furthermore, our study provides evidence that rescued spatial learning deficits and

1 prevented hippocampal synaptic loss can occur despite an increasing A $\beta$ -PET signal upon  
2 immunomodulation. The combined results might sound contradictory, but according to the  
3 amyloid cascade hypothesis, A $\beta$ -oligomers rather than A $\beta$ -fibrils are the neurotoxic A $\beta$ -forms  
4 (44; 50). Indeed, high concentrations of A $\beta$ -oligomers isolated from brain of AD patients  
5 correlated significantly with the degree of cognitive impairment prior to death (51–53).  
6 Furthermore, A $\beta$ -oligomers have been shown to disrupt long-term potentiation at synapses  
7 and provoke long-term depression (54–56). Thus, improved spatial learning and rescued  
8 synaptic density could reflect a therapeutically induced shift of A $\beta$  to hypercondensed  
9 plaques, in keeping with observations of greater neuritic damage in association with more  
10 diffuse plaques (59; 60). Furthermore, strongly in line with our present data, a recent study  
11 argued that microglia promoted formation of dense-core plaques may play a protective role in  
12 AD (61).

13 The shift in plaque composition was more pronounced in *App*<sup>NL-G-F</sup> mice than in the PS2APP  
14 model. Due to the expression of the Arctic mutation (25), the A $\beta$ -deposits of the *App*<sup>NL-G-F</sup> line  
15 consist predominantly of A $\beta$ -oligomers (29; 40). However, we observed no improvement in  
16 cognition in the APP knock-in mouse line after pioglitazone treatment. We attribute the  
17 lacking improvement of spatial learning to the minor deterioration of this model in water maze  
18 assessment at ten months of age (64; 29). Our present observation stand in contrast with  
19 previous studies showing that PPAR- $\gamma$  agonists reduced A $\beta$ -plaque formation by increasing  
20 A $\beta$ -clearance (15; 65; 14). However, those studies only performed endpoint analyses, in part  
21 after short-term treatment of nine days (14); the current work is the first to perform  
22 longitudinal *in vivo* monitoring of A $\beta$ -deposition over a five-month chronic PPAR- $\gamma$  treatment  
23 period. We note that the divergent results could also reflect the different markers used for  
24 immunohistochemistry compared to our present differentiated analysis of fibrillar and  
25 oligomeric A $\beta$  components. As such, the decreased NAB228-positive plaque fraction in our  
26 treated *App*<sup>NL-G-F</sup> mice fits to the earlier reported decrease of the 6E10-positive area in  
27 APPPS1 mice (14). We note that the biochemical source of the A $\beta$ -PET signal is still a matter  
28 of controversy, since some studies found no impact of non-fibrillar plaque components (66)

1 whereas others postulated a significant contribution of non-fibrillar A $\beta$  to the A $\beta$ -PET signal  
2 (67–69). Recently, we were able to show that non-fibrillar components of A $\beta$  plaques indeed  
3 contribute to the net A $\beta$ -PET signal (70). Therefore, increases in the [ $^{18}$ F]florbetaben-PET  
4 signal must be precisely differentiated and interpreted with caution. Development of new PET  
5 tracers that selectively target oligomeric A $\beta$  may realize a more precise discrimination of  
6 neurotoxic A $\beta$  plaque manifestation (71; 72) and its impact on disease severity.

7 In line with previous pioglitazone studies (14; 15), we observed a decrease in microglial  
8 activity (23), thus confirming the immunomodulatory effect of the drug. Since earlier studies  
9 have shown that fibrillary A $\beta$ -deposits activate microglial cells (40) which then migrate  
10 towards the fibrillar deposits (6), resulting in an increased number of activated microglial cells  
11 surrounding A $\beta$ -plaques (8), the inactivation and migration effects could cancel each other  
12 out. Based on our findings in both AD models, we conclude that, by increasing plaque  
13 fibrillarity, the immunomodulatory effect of pioglitazone overweighs the potential triggering of  
14 activated microglia. Modulating microglial phenotype to restore their salutogenic effects may  
15 prove crucial in new therapeutic trials (74). In several preclinical and clinical trials,  
16 pioglitazone proved to be a promising immunomodulatory approach for treatment of AD,  
17 especially in patients with comorbid diabetes (75; 76). However, a large phase III trial of  
18 pioglitazone in patients with mild AD was discontinued due to lacking efficacy (19). Our data  
19 calls for monitoring of the effects of PPAR $\gamma$  agonists by A $\beta$ -PET, which may help to stratify  
20 treatment responders based on their individual rates of A $\beta$  plaque accumulation. Based on  
21 our results, we submit that personalized PPAR $\gamma$  agonist treatment might be effective when  
22 the patient has capacity to successfully shift toxic oligomeric A $\beta$  towards fibrillar parts of the  
23 plaque.

24

## 25 **5. Limitations**

26 We note as a limitation that PPAR $\gamma$  receptor agonists represent a rather unspecific class of  
27 drugs since PPAR $\gamma$  is involved in various pathways in addition to peroxisome activation,  
28 notably including glucose metabolism and insulin sensitization [48]. Future studies should

1 address if the observed effects on A $\beta$  plaque composition are also present for more selective  
2 immunomodulation strategies such as NLRP3 regulators [49]. Two different water maze  
3 examinations were performed in the present study due a switch of the laboratory. Hence,  
4 although we calculated a similar water maze performance index by a PCA of the main read-  
5 outs of each examination, the obtained results and the sensitivity to detect spatial learning  
6 deficits are not comparable between both A $\beta$  mouse models.

7

## 8 **6. Conclusion**

9 In conclusion, chronic pioglitazone treatment provoked a longitudinal A $\beta$ -PET signal increase  
10 in transgenic and knock-in mice due to a shift towards hypercondensed fibrillar A $\beta$  plaques.  
11 The increasing rate of A $\beta$ -PET signal increase with time was accompanied by ameliorated  
12 cognitive performance and attenuated synaptic loss after pioglitazone treatment. It follows  
13 that increasing A $\beta$ -PET signal need not always indicate a treatment failure, since it is the  
14 composition of A $\beta$  plaques that determines their neurotoxicity. In summary, our preclinical  
15 data indicate that a shift towards increasing fibrillar amyloidosis can be beneficial for the  
16 preservation of cognitive function and synaptic integrity.

17

## 18 **7. Declarations**

### 19 **Ethical Approval and Consent to participate**

20 Not applicable

21

### 22 **Consent for publication**

23 Not applicable

24

### 25 **Availability of data and materials**

26 All source data are available from the corresponding author upon reasonable request.

27

### 28 **Competing interests**



1 T.B., M.D., G.B., F.P., B.Z., and C.S. reported no biomedical financial interests or potential  
2 conflicts of interest. N.F. is funded by the BrightFocus foundation. K.W., F.E., C.S., Y.S., and  
3 K.O. reported no biomedical financial interests or potential conflicts of interest. G.K. is an  
4 employee of ISAR bioscience. X.X., C.F., S.L., F-J.G., L.B, B.U., and P.B. reported no  
5 biomedical financial interests or potential conflicts of interest. K.B. is an employee of Roche.  
6 H.A. reported no biomedical financial interests or potential conflicts of interest. A.R. has  
7 received research support and speaker honoraria from Siemens. P.C., M.W. M.M.D. and J.H.  
8 reported no biomedical financial interests or potential conflicts of interest. M.B. received  
9 speaker honoraria from GE healthcare, Roche and LMI and is an advisor of LMI.

10

## 11 **Funding**

12 The study was supported by the *FöFoLe* Program of the Faculty of Medicine of the Ludwig  
13 Maximilian University, Munich (grant to M.B.). This work was funded by the Deutsche  
14 Forschungsgemeinschaft (DFG, German Research Foundation) to A.R. and M.B. – project  
15 numbers BR4580/1-1/ RO5194/1-1. The work was supported by the Deutsche  
16 Forschungsgemeinschaft (DFG, German Research Foundation) under Germany's  
17 Excellence Strategy within the framework of the Munich Cluster for Systems Neurology (EXC  
18 2145 SyNergy – ID 390857198). M.B. was supported by the Alzheimer Forschung Initiative  
19 e.V (grant number 19063p).

20

## 21 **Author's contributions**

22 K.B., H.A., A.R., P.C., M.W., M.M.D., J.H. and M.B. conceived the study and analyzed the  
23 results. T.B., M.D. and M.B. wrote the manuscript with further input from all co-authors. M.D.,  
24 G.B., C.Sch., K.W., F.E., C.Sa., and C.F. performed the small animal PET experiments and  
25 small animal PET data analyses. T.B., F.P., Y.S., K.O., G.K., X.X., M.M.D. and J.H.  
26 performed immunohistochemistry experiments, analyses, and interpretation. F.J.G. and S.L.  
27 performed PET tracer synthesis and analyses. N.F. analyzed and interpreted serial PET data  
28 and contributed to their analysis. G.B., B.Z., K.W., and H.A. performed spatial learning tests

1 and interpretation. B.U.,K.B., and M.W. supplied the study with animal models and  
2 interpreted the dedicated results. All authors contributed with intellectual content.

3

#### 4 **Acknowledgements**

5 We thank Karin Bormann-Giglmair and Rosel Oos for excellent technical assistance.  
6 Florbetaben precursor was provided by Piramal Imaging. We thank Takashi Saito and  
7 Takaomi C. Saido for providing the *App*<sup>NL-G-F</sup> mice.

8

#### 9 **References**

10

- 11 1. Ziegler-Graham K, Brookmeyer R, Johnson E, Arrighi HM (2008): Worldwide variation in the  
12 doubling time of Alzheimer's disease incidence rates. *Alzheimer's & Dementia* 4: 316–323.
- 13 2. H. Braak, E. Braak (1991): Neuropathological staging of Alzheimer-related changes. *Acta*  
14 *Neuropathol* 82: 239–259.
- 15 3. M Brendel, A Jaworska, J Herms, J Trambauer, C Rötzer, F-J Gildehaus, *et al.* (2015): Amyloid-  
16 PET predicts inhibition of de novo plaque formation upon chronic  $\gamma$ -secretase modulator treatment.  
17 *Mol Psychiatry* 20: 1179–1187.
- 18 4. Heneka MT, Carson MJ, Khoury JE, Landreth GE, Brosseron F, Feinstein DL, *et al.* (2015):  
19 Neuroinflammation in Alzheimer's disease. *The Lancet Neurology* 14: 388–405.
- 20 5. Zimmer E, Leuzy A, Benedet A, Breitner J, Gauthier S, Rosa-Neto P (2014): Tracking  
21 neuroinflammation in Alzheimer's disease. The role of positron emission tomography imaging. *J*  
22 *Neuroinflammation* 11: 120.
- 23 6. Petra Föger, Jasmin K Hefendehl, Karthik Veeraraghavalu, Ann-Christin Wendeln, Christine  
24 Schlosser, Ulrike Obermüller, *et al.* (2017): Microglia turnover with aging and in an Alzheimer's  
25 model via long-term in vivo single-cell imaging. *Nat Neurosci* 20: 1371–1376.
- 26 7. Hickman SE, Allison EK, El Khoury J (2008): Microglial Dysfunction and Defective -Amyloid  
27 Clearance Pathways in Aging Alzheimer's Disease Mice. *Journal of Neuroscience* 28: 8354–8360.
- 28 8. Blume T, Focke C, Peters F, Deussing M, Albert NL, Lindner S, *et al.* (2018): Microglial response to  
29 increasing amyloid load saturates with aging. A longitudinal dual tracer in vivo  $\mu$ PET-study. *Journal*  
30 *of neuroinflammation* 15: 307.
- 31 9. Heppner FL, Ransohoff RM, Becher B (2015): Immune attack. The role of inflammation in  
32 Alzheimer disease. *Nature reviews. Neuroscience* 16.
- 33 10. Krabbe G, Halle A, Matyash V, Rinnenthal JL, Eom GD, Bernhardt U, *et al.* (2013): Functional  
34 impairment of microglia coincides with Beta-amyloid deposition in mice with Alzheimer-like  
35 pathology. *PLoS ONE* 8: e60921.
- 36 11. Wolfgang J Streit, Qing-Shan Xue, Jasmin Tischer, Ingo Bechmann (2014): Microglial pathology.  
37 *acta neuropathol commun* 2: 1–17.
- 38 12. C. Y. Daniel Lee, Gary E. Landreth (2010): The role of microglia in amyloid clearance from the AD  
39 brain. *J Neural Transm* 117: 949–960.
- 40 13. Rogers J, Kirby LC, Hempelman SR, Berry DL, McGeer PL, Kaszniak AW, *et al.* (1993): Clinical  
41 trial of indomethacin in Alzheimer's disease. *Neurology* 43: 1609–1611.
- 42 14. Mandrekar-Colucci S, Karlo JC, Landreth GE (2012): Mechanisms Underlying the Rapid  
43 Peroxisome Proliferator-Activated Receptor- -Mediated Amyloid Clearance and Reversal of  
44 Cognitive Deficits in a Murine Model of Alzheimer's Disease. *Journal of Neuroscience* 32: 10117–  
45 10128.
- 46 15. Yamanaka M, Ishikawa T, Griep A, Axt D, Kummer MP, Heneka MT (2012): PPAR /RXR -Induced  
47 and CD36-Mediated Microglial Amyloid- Phagocytosis Results in Cognitive Improvement in  
48 Amyloid Precursor Protein/Presenilin 1 Mice. *Journal of Neuroscience* 32: 17321–17331.
- 49 16. Moon JH, Kim HJ, Yang AH, Kim HM, Lee B-W, Kang ES, *et al.* (2012): The effect of rosiglitazone  
50 on LRP1 expression and amyloid  $\beta$  uptake in human brain microvascular endothelial cells. A

- 1 possible role of a low-dose thiazolidinedione for dementia treatment. *The international journal of*
- 2 *neuropsychopharmacology* 15: 135–142.
- 3 17. Hannah Seok, Minyoung Lee, Eugene Shin, Mi Ra Yun, Yong-ho Lee, Jae Hoon Moon, *et al.*: Low-
- 4 dose pioglitazone can ameliorate learning and memory impairment in a mouse model of dementia
- 5 by increasing LRP1 expression in the hippocampus. *Sci Rep* 9: 1–10.
- 6 18. Cheng H, Shang Y, Jiang L, Shi T-I, Wang L (2016): The peroxisome proliferators activated
- 7 receptor-gamma agonists as therapeutics for the treatment of Alzheimer's disease and mild-to-
- 8 moderate Alzheimer's disease. A meta-analysis. *The International journal of neuroscience* 126:
- 9 299–307.
- 10 19. Geldmacher DS, Fritsch T, McClendon MJ, Landreth G (2011): A randomized pilot clinical trial of
- 11 the safety of pioglitazone in treatment of patients with Alzheimer disease. *Archives of neurology* 68:
- 12 45–50.
- 13 20. Manook A, Yousefi BH, Willuweit A, Platzer S, Reder S, Voss A, *et al.* (2012): Small-Animal PET
- 14 Imaging of Amyloid-Beta Plaques with [11C]PiB and Its Multi-Modal Validation in an APP/PS1
- 15 Mouse Model of Alzheimer's Disease. *PLoS ONE* 7: e31310.
- 16 21. Brendel M, Jaworska A, Griebinger E, Rötzer C, Burgold S, Gildehaus FJ, *et al.* (2015): Cross-
- 17 sectional comparison of small animal [18F]-florbetaben amyloid-PET between transgenic AD
- 18 mouse models. *PLoS ONE* 10.
- 19 22. Rominger A, Brendel M, Burgold S, Keppler K, Baumann K, Xiong G, *et al.* (2013): Longitudinal
- 20 Assessment of Cerebral -Amyloid Deposition in Mice Overexpressing Swedish Mutant -Amyloid
- 21 Precursor Protein Using 18F-Florbetaben PET. *Journal of Nuclear Medicine* 54: 1127–1134.
- 22 23. Biechele G, Blume T, Deussing M, Zott B, Shi Y, Xiang X *et al.* (2021): Pre-therapeutic Microglia
- 23 Activation and Sex Determine Therapy Effects of Chronic Immunomodulation. *bioRxiv*.
- 24 24. Ozmen L, Albientz A, Czech C, Jacobsen H (2008): Expression of Transgenic APP mRNA Is the
- 25 Key Determinant for Beta-Amyloid Deposition in PS2APP Transgenic Mice. *Neurodegener Dis* 6:
- 26 29–36.
- 27 25. Saito T, Matsuba Y, Mihira N, Takano J, Nilsson P, Itohara S, *et al.* (2014): Single App knock-in
- 28 mouse models of Alzheimer's disease. *Nature neuroscience* 17.
- 29 26. Dorr A, Sled JG, Kabani N (2007): Three-dimensional cerebral vasculature of the CBA mouse
- 30 brain. A magnetic resonance imaging and micro computed tomography study. *NeuroImage* 35.
- 31 27. Brendel M, Probst F, Jaworska A, Overhoff F, Korzhova V, Albert NL, *et al.* (2016): Glial Activation
- 32 and Glucose Metabolism in a Transgenic Amyloid Mouse Model. A Triple-Tracer PET Study.
- 33 *Journal of Nuclear Medicine* 57: 954–960.
- 34 28. Overhoff F, Brendel M, Jaworska A, Korzhova V, Delker A, Probst F, *et al.* (2016): Automated
- 35 Spatial Brain Normalization and Hindbrain White Matter Reference Tissue Give Improved [18F]-
- 36 Florbetaben PET Quantitation in Alzheimer's Model Mice. *Front. Neurosci.* 10: 14022.
- 37 29. Sacher C, Blume T, Beyer L, Peters F, Eckenweber F, Sgobio C, *et al.* (2019): Longitudinal PET
- 38 Monitoring of Amyloidosis and Microglial Activation in a Second-Generation Amyloid- $\beta$  Mouse
- 39 Model. *Journal of nuclear medicine : official publication, Society of Nuclear Medicine* 60: 1787–
- 40 1793.
- 41 30. Biechele G, Wind K, Blume T, Sacher C, Beyer L, Eckenweber F, *et al.* (2020): Microglial Activation
- 42 in the Right Amygdala-Entorhinal-Hippocampal Complex is Associated with Preserved Spatial
- 43 Learning in AppNL-G-F mice. *NeuroImage*: 117707.
- 44 31. Marc Aurel Busche, Maja Kekuš, Helmuth Adelsberger, Takahiro Noda, Hans Förstl, Israel Nelken,
- 45 *et al.* (2015): Rescue of long-range circuit dysfunction in Alzheimer's disease models. *Nat Neurosci*
- 46 18: 1623–1630.
- 47 32. Focke C, Blume T, Zott B, Shi Y, Deussing M, Peters F, *et al.* (2019): Early and Longitudinal
- 48 Microglial Activation but Not Amyloid Accumulation Predicts Cognitive Outcome in PS2APP Mice.
- 49 *Journal of nuclear medicine : official publication, Society of Nuclear Medicine* 60.
- 50 33. Keskin AD, Kekuš M, Adelsberger H, Neumann U, Shimshek DR, Song B, *et al.* (2017): BACE
- 51 inhibition-dependent repair of Alzheimer's pathophysiology. *Proceedings of the National Academy*
- 52 *of Sciences of the United States of America* 114: 8631–8636.
- 53 34. Sauvage M, Brabet P, Holsboer F, Bockaert J, Steckler T (2000): Mild deficits in mice lacking
- 54 pituitary adenylate cyclase-activating polypeptide receptor type 1 (PAC1) performing on memory
- 55 tasks. *Molecular Brain Research* 84: 79–89.
- 56 35. Bromley-Brits K, Deng Y, Song W (2011): Morris water maze test for learning and memory deficits
- 57 in Alzheimer's disease model mice. *Journal of visualized experiments : JoVE*.
- 58 36. Brendel M, Focke C, Blume T, Peters F, Deussing M, Probst F, *et al.* (2017): Time Courses of
- 59 Cortical Glucose Metabolism and Microglial Activity Across the Life Span of Wild-Type Mice. A PET
- 60 Study. *Journal of nuclear medicine : official publication, Society of Nuclear Medicine* 58.

- 1 37. Brendel M, Kleinberger G, Probst F, Jaworska A, Overhoff F, Blume T, *et al.* (2017): Increase of  
2 TREM2 during Aging of an Alzheimer's Disease Mouse Model Is Paralleled by Microglial Activation  
3 and Amyloidosis. *Front. Aging Neurosci.* 9: 795.
- 4 38. Dorostkar MM, Dreosti E, Odermatt B, Lagnado L (2010): Computational processing of optical  
5 measurements of neuronal and synaptic activity in networks. *Journal of Neuroscience Methods*  
6 188: 141–150.
- 7 39. Page RM, Baumann K, Tomioka M, Pérez-Revuelta BI, Fukumori A, Jacobsen H, *et al.* (2008):  
8 Generation of Abeta38 and Abeta42 is independently and differentially affected by familial  
9 Alzheimer disease-associated presenilin mutations and gamma-secretase modulation. *The Journal*  
10 *of biological chemistry* 283: 677–683.
- 11 40. Sebastian ML, Müller SA, Colombo AV, Tanriover G, König J, Roth S, *et al.* (2020): Fibrillar A $\beta$   
12 triggers microglial proteome alterations and dysfunction in Alzheimer mouse models. *eLife* 9.
- 13 41. Puzzo D, Privitera L, Leznik E, Fa M, Staniszewski A, Palmeri A, *et al.* (2008): Picomolar amyloid-  
14 beta positively modulates synaptic plasticity and memory in hippocampus. *The Journal of*  
15 *neuroscience : the official journal of the Society for Neuroscience* 28: 14537–14545.
- 16 42. Lambert MP, Barlow AK, Chromy BA, Edwards C, Freed R, Liosatos M, *et al.* (1998): Diffusible,  
17 nonfibrillar ligands derived from Abeta1–42 are potent central nervous system neurotoxins.  
18 *Proceedings of the National Academy of Sciences of the United States of America* 95: 6448–6453.
- 19 43. Ganesh M, Shankar, Brenda L. Bloodgood, Matthew Townsend, Dominic M. Walsh, Dennis J.  
20 Selkoe, Bernardo L. Sabatini (2007): Natural Oligomers of the Alzheimer Amyloid- $\beta$  Protein Induce  
21 Reversible Synapse Loss by Modulating an NMDA-Type Glutamate Receptor-Dependent Signaling  
22 Pathway. *J. Neurosci.* 27: 2866–2875.
- 23 44. Christian Haass, Dennis J. Selkoe (2007): Soluble protein oligomers in neurodegeneration.  
24 Lessons from the Alzheimer's amyloid  $\beta$ -peptide. *Nat Rev Mol Cell Biol* 8: 101–112.
- 25 45. Hardy J, Selkoe DJ (2002): The amyloid hypothesis of Alzheimer's disease. Progress and problems  
26 on the road to therapeutics. *Science (New York, N.Y.)* 297: 353–356.
- 27 46. Zott B, Simon MM, Hong W, Unger F, Chen-Engerer H-J, Frosch MP, *et al.* (2019): A vicious cycle  
28 of  $\beta$  amyloid-dependent neuronal hyperactivation. *Science (New York, N.Y.)* 365: 559–565.
- 29 47. Valotassiou V, Malamitsi J, Papatriantafyllou J, Dardiotis E, Tsougos I, Psimadas D, *et al.* (2018):  
30 SPECT and PET imaging in Alzheimer's disease. *Annals of nuclear medicine* 32.
- 31 48. Laforce R, Soucy J-P, Sellami L, Dallaire-Théroux C, Brunet F, Bergeron D, *et al.* (2018): Molecular  
32 imaging in dementia. Past, present, and future. *Alzheimer's & Dementia* 14: 1522–1552.
- 33 49. Hansson O, Seibyl J, Stomrud E, Zetterberg H, Trojanowski JQ, Bittner T, *et al.* (2018): CSF  
34 biomarkers of Alzheimer's disease concord with amyloid- $\beta$  PET and predict clinical progression. A  
35 study of fully automated immunoassays in BioFINDER and ADNI cohorts. *Alzheimer's & dementia :*  
36 *the journal of the Alzheimer's Association* 14: 1470–1481.
- 37 50. Selkoe DJ, Hardy J (2016): The amyloid hypothesis of Alzheimer's disease at 25 years. *EMBO*  
38 *molecular medicine* 8.
- 39 51. Wang J, Dickson DW, Trojanowski JQ, Lee VM (1999): The levels of soluble versus insoluble brain  
40 Abeta distinguish Alzheimer's disease from normal and pathologic aging. *Experimental neurology*  
41 158: 328–337.
- 42 52. Lue L-F, Kuo Y-M, Roher AE, Brachova L, Shen Y, Sue L, *et al.* (1999): Soluble Amyloid  $\beta$  Peptide  
43 Concentration as a Predictor of Synaptic Change in Alzheimer's Disease. *The American Journal of*  
44 *Pathology* 155: 853–862.
- 45 53. McLean CA, Cherny RA, Fraser FW, Fuller SJ, Smith MJ, Beyreuther K, *et al.* (1999): Soluble pool  
46 of Abeta amyloid as a determinant of severity of neurodegeneration in Alzheimer's disease. *Annals*  
47 *of neurology* 46.
- 48 54. Hu NW, Im Smith, Walsh DM, Rowan MJ (2008): Soluble amyloid-beta peptides potently disrupt  
49 hippocampal synaptic plasticity in the absence of cerebrovascular dysfunction in vivo. *Brain : a*  
50 *journal of neurology* 131.
- 51 55. Cullen WK, Suh YH, Anwyl R, Rowan MJ (1997): Block of LTP in rat hippocampus in vivo by beta-  
52 amyloid precursor protein fragments. *Neuroreport* 8.
- 53 56. Klyubin I, Ondrejčák T, Hayes J, Cullen WK, Mably AJ, Walsh DM, *et al.* (2014): Neurotransmitter  
54 receptor and time dependence of the synaptic plasticity disrupting actions of Alzheimer's disease  
55 A $\beta$  in vivo. *Philosophical Transactions of the Royal Society B: Biological Sciences* 369.
- 56 57. Tong L, Thornton PL, Balazs R, Cotman CW (2001): Beta -amyloid-(1-42) impairs activity-  
57 dependent cAMP-response element-binding protein signaling in neurons at concentrations in which  
58 cell survival is not compromised. *The Journal of biological chemistry* 276.
- 59 58. Pascale N. Lacor, Maria C. Buniel, Paul W. Furlow, Antonio Sanz Clemente, Pauline T. Velasco,  
60 Margaret Wood, *et al.* (2007): A $\beta$  Oligomer-Induced Aberrations in Synapse Composition, Shape,

- 1 and Density Provide a Molecular Basis for Loss of Connectivity in Alzheimer's Disease. *J.*  
2 *Neurosci.* 27: 796–807.
- 3 59. Jason D Ulrich, Mary Beth Finn, Yaming Wang, Alice Shen, Thomas E Mahan, Hong Jiang, *et al.*  
4 (2014): Altered microglial response to A $\beta$  plaques in APPPS1-21 mice heterozygous for TREM2.  
5 *Mol Neurodegeneration* 9: 1–9.
- 6 60. Wang Y, Ulland TK, Ulrich JD, Song W, Tzaferis JA, Hole JT, *et al.* (2016): TREM2-mediated early  
7 microglial response limits diffusion and toxicity of amyloid plaques. *The Journal of experimental*  
8 *medicine* 213: 667–675.
- 9 61. Youtong Huang, Kaisa E. Happonen, Patrick G. Burrola, Carolyn O'Connor, Nasun Hah, Ling  
10 Huang, *et al.* (2021): Microglia use TAM receptors to detect and engulf amyloid  $\beta$  plaques. *Nat*  
11 *Immunol* 22: 586–594.
- 12 62. Sasaguri H, Nilsson P, Hashimoto S, Nagata K, Saito T, Strooper B de, *et al.* (2017): APP mouse  
13 models for Alzheimer's disease preclinical studies. *The EMBO journal* 36: 2473–2487.
- 14 63. Saido TC, Iwatsubo T, Mann DM, Shimada H, Ihara Y, Kawashima S (1995): Dominant and  
15 differential deposition of distinct beta-amyloid peptide species, A beta N3(pE), in senile plaques.  
16 *Neuron* 14.
- 17 64. Masuda A, Kobayashi Y, Kogo N, Saito T, Saido TC, Itohara S (2016): Cognitive deficits in single  
18 App knock-in mouse models. *Neurobiology of learning and memory* 135.
- 19 65. Camacho IE, Serneels L, Spittaels K, Merchiers P, Dominguez D, De SB (2004): Peroxisome-  
20 proliferator-activated receptor gamma induces a clearance mechanism for the amyloid-beta  
21 peptide. *The Journal of neuroscience : the official journal of the Society for Neuroscience* 24.
- 22 66. Catafau AM, Bullich S, Seibyl JP, Barthel H, Ghetti B, Leverenz J, *et al.* (2016): Cerebellar  
23 Amyloid- $\beta$  Plaques. How Frequent Are They, and Do They Influence 18F-Florbetaben SUV Ratios?  
24 *Journal of nuclear medicine : official publication, Society of Nuclear Medicine* 57: 1740–1745.
- 25 67. Ikonomic MD, Buckley CJ, Heurling K, Sherwin P, Jones PA, Zanette M, *et al.* (2016): Post-  
26 mortem histopathology underlying  $\beta$ -amyloid PET imaging following flutemetamol F 18 injection.  
27 *Acta neuropathologica communications* 4: 130.
- 28 68. Milos D. Ikonomic, Christopher J. Buckley, Eric E. Abrahamson, Julia K. Kofler, Chester A.  
29 Mathis, William E. Klunk, *et al.* (2020): Post-mortem analyses of PiB and flutemetamol in diffuse  
30 and cored amyloid- $\beta$  plaques in Alzheimer's disease. *Acta Neuropathol* 140: 463–476.
- 31 69. Milos D. Ikonomic, Enrico R. Fantoni, Gill Farrar, Stephen Salloway (2018): Infrequent false  
32 positive [ 18 F]flutemetamol PET signal is resolved by combined histological assessment of neuritic  
33 and diffuse plaques. *Alz Res Therapy* 10: 1–4.
- 34 70. Gloria Biechele, Laura Sebastian Monasor, Karin Wind, Tanja Blume, Samira Parhizkar, Thomas  
35 Arzberger, Christian Sacher, Leonie Beyer, Florian Eckenweber, Franz-Josef Gildehaus, Barbara  
36 von Ungern-Sternberg, Michael Willem, Peter Bartenstein, Paul Cumming, Axel Rominger, Jochen  
37 Herms, Stefan F. Lichtenthaler, Christian Haass, Sabina Tahirovic, Matthias Brendel (2021): Glitter  
38 in the darkness? Non-fibrillar  $\beta$ -amyloid plaque components significantly impact the  $\beta$ -amyloid PET  
39 signal. *Journal of Nuclear Medicine* 2021.
- 40 71. Sehlin D, Fang XT, Cato L, Antoni G, Lannfelt L, Syvänen S (2016): Antibody-based PET imaging  
41 of amyloid beta in mouse models of Alzheimer's disease. *Nat Commun* 7: 306.
- 42 72. Fang XT, Hultqvist G, Meier, SR, Antoni G, Sehlin D, Syvänen S (2019): High detection sensitivity  
43 with antibody-based PET radioligand for amyloid beta in brain. *NeuroImage* 184.
- 44 73. Li-Kai Huang, Shu-Ping Chao, Chaur-Jong Hu (2020): Clinical trials of new drugs for Alzheimer  
45 disease. *J Biomed Sci* 27: 1–13.
- 46 74. Lewcock JW, Schlepckow K, Di Paolo G, Tahirovic S, Monroe KM, Haass C (2020): Emerging  
47 Microglia Biology Defines Novel Therapeutic Approaches for Alzheimer's Disease. *Neuron* 108:  
48 801–821.
- 49 75. Liu J, Wang LN, Jia JP (2015): Peroxisome proliferator-activated receptor-gamma agonists for  
50 Alzheimer's disease and amnesic mild cognitive impairment. A systematic review and meta-  
51 analysis. *Drugs & aging* 32.
- 52 76. Cao B, Rosenblat JD, Brietzke E, Park C, Lee Y, Musial N, *et al.* (2018): Comparative efficacy and  
53 acceptability of antidiabetic agents for Alzheimer's disease and mild cognitive impairment. A  
54 systematic review and network meta-analysis. *Diabetes, obesity & metabolism* 20.
- 55 77. Zou C, Shi Y, Ohli J, Schüller U, Dorostkar MM, Herms J (2016): Neuroinflammation impairs  
56 adaptive structural plasticity of dendritic spines in a preclinical model of Alzheimer's disease. *Acta*  
57 *Neuropathol* 131: 235–246.
- 58  
59

1

2

3

4

5

## 6 **Legends tables and figures**

### 7 **Fig.1**

#### 8 **Figure 1: PPAR $\gamma$ stimulation in PS2APP mice provokes an increase in the A $\beta$ -PET**

9 **signal.** A) Regional analysis of group-averaged standardized uptake value ratio (SUVR)

10 images of the A $\beta$ -PET radiotracer [ $^{18}$ F]florbetaben in untreated and in pioglitazone-treated

11 PS2APP mice aged eight and 13 months. Coronal and axial slices are projected upon a

12 standard MRI template. B) Plots show cortical SUVR values of [ $^{18}$ F]florbetaben in PS2APP

13 and wild-type (WT) mice between eight and 13 months of age under vehicle (Veh) or

14 pioglitazone (Pio) treatment. The A $\beta$ -PET signal increased in PS2APP mice during aging, but

15 the increase was more pronounced in pioglitazone treated mice ( $F_{(1,12)} = 12.9$ ;  $p = 0.0017$ ). In

16 wild-type animals, no difference was observed between untreated and treated animals during

17 aging ( $F_{(1,13)} = 0.490$ ;  $p = 0.496$ ). Data are presented as mean  $\pm$  SEM. P values of Bonferroni

18 *post hoc* test result from two-way ANOVA. N=10-13 PS2APP; N=7-8 WT.

### 19 **Fig.2**

#### 20 **Figure 2: Distinct A $\beta$ -PET signal increase upon PPAR $\gamma$ stimulation in *App*<sup>NL-G-F</sup> mice**

21 **with limited plaque fibrillarity and without overexpression of APP.** A) Regional analysis

22 of group-averaged standardized uptake value ratios (SUVR) of the A $\beta$ -PET radiotracer

23 [ $^{18}$ F]florbetaben in untreated and in pioglitazone treated *App*<sup>NL-G-F</sup> animals at the age of 5, 7.5

24 and 10 months. Coronal and axial slices are projected upon a standard MRI template. B)

25 Plots show cortical SUVR of [ $^{18}$ F]florbetaben in *App*<sup>NL-G-F</sup> mice between the age of five and

26 ten months under vehicle or pioglitazone treatment. A $\beta$ -PET signal increased in untreated

27 mice during age but the increase was more pronounced in pioglitazone treated *App*<sup>NL-G-F</sup> mice

1 ( $F_{(2,70)} = 20.12$ ;  $p < 0.0001$ ). Data are presented as mean  $\pm$  SEM. P values of Bonferroni *post*  
2 *hoc* test result from two-way ANOVA. N=14-23.

### 3 **Fig. 3**

4 **Figure 3: Pioglitazone treatment triggers a change in plaque composition in two**  
5 **different mouse models of amyloidosis.** Staining of fibrillary A $\beta$  (methoxy-X04, cyan) and  
6 oligomeric A $\beta$  (NAB228, magenta) in vehicle and pioglitazone treated PS2APP mice A) and  
7 *App*<sup>NL-G-F</sup> mice B). C) The plaque area covered by methoxy-X04 staining was significantly  
8 higher ( $t_{(9)} = 3.612$ ;  $p = 0.0056$ ), whereas the plaque area covered by NAB228 staining  
9 remained equal ( $t_{(10)} = 0.175$ ;  $p = 0.865$ ) in pioglitazone treated PS2APP mice. The overlay of  
10 NAB228 and methoxy staining increased under pioglitazone treatment ( $t_{(9)} = 3.432$ ;  $p =$   
11  $0.0075$ ). D) The number of methoxy positive A $\beta$ -plaques did not change under pioglitazone  
12 treatment in PS2APP-mice. E) In *App*<sup>NL-G-F</sup> mice, methoxy coverage ( $t_{(11)} = 5.802$ ;  $p =$   
13  $0.0001$ ), NAB228 coverage ( $t_{(11)} = 5.80$ ;  $p = 0.0001$ ), as well as the overlay of both stainings  
14 ( $t_{(11)} = 2.93$ ;  $p = 0.0138$ ), increased under pioglitazone treatment. F) In *App*<sup>NL-G-F</sup> mice, the  
15 number of methoxy positive A $\beta$ -plaques did not change under pioglitazone. Data are  
16 presented as mean  $\pm$  SEM;  $n = 5-13$  mice. Two-sample student's *t*-test results: \*  $p < 0.05$ ; \*\*  
17  $p < 0.01$ ; \*\*\*  $p < 0.001$ .

18

### 19 **Fig. 4**

20 **Figure 4: Pioglitazone treatment reduces microglial activation in both AD mouse**  
21 **models.** Iba1- (magenta) as well as CD68-(cyan) positive microglial cells in PS2APP A) and  
22 *App*<sup>NL-G-F</sup> mice B). C) The area of Iba1 positive microglial cells ( $t_{(8)} = 5.95$ ;  $p = 0.0003$ ) as well  
23 as CD68 positive microglial cells ( $t_{(8)} = 4.58$ ;  $p = 0.0018$ ) decreased in treated PS2APP mice.  
24 The same effect was observed in *App*<sup>NL-G-F</sup> mice where the area covered by Iba1 positive ( $t_{(11)}$   
25  $= 4.21$ ;  $p = 0.0015$ ) as well as CD68 positive microglial cells ( $t_{(11)} = 2.91$ ;  $p = 0.014$ ) were  
26 significantly reduced in treated compared to untreated mice. Data are presented as mean  $\pm$   
27 SEM;  $n = 5-7$  mice. Two-sample student's *t*-test results: \*  $p < 0.05$ ; \*\*  $p < 0.01$ ; \*\*\*  $p <$   
28  $0.001$ .

1

2 **Fig. 5**

3 **Figure 5. Improved spatial learning correlates with an increased A $\beta$ -PET rate of**  
4 **change in PS2APP mice.** A) One-way ANOVA revealed a significant difference of the water  
5 maze performance index between pioglitazone treated and untreated PS2APP and wild-type  
6 groups ( $F_{(3,34)} = 10.37$ ;  $p < 0.0001$ ;  $N=7-13$ ). Group-wise comparisons revealed that  
7 pioglitazone treated PS2APP mice achieved a higher performance index in the water maze  
8 test compared to untreated PS2APP mice ( $p = 0.016$ ), whereas wild-type animals showed no  
9 significant difference between treatment groups ( $p > 0.999$ ). B) One-way ANOVA revealed a  
10 significant difference of the water maze performance index between pioglitazone treated and  
11 untreated *App*<sup>NL-G-F</sup> and WT groups ( $F_{(3,34)} = 5.825$ ;  $p = 0.0016$ ). However, pioglitazone  
12 treated *App*<sup>NL-G-F</sup> mice showed no difference in the water maze performance index when  
13 compared to untreated *App*<sup>NL-G-F</sup> mice ( $p > 0.999$ ) and wild-type animals again showed no  
14 significant difference between treatment groups ( $p > 0.999$ ). Scatter plots show correlations  
15 between the A $\beta$ -PET rate of change ( $[^{18}\text{F}]$ florbetaben;  $\Delta\text{SUVR}$ ) during the treatment period  
16 and individual cognitive testing scores in C) PS2APP mice and in D) *App*<sup>NL-G-F</sup> mice (R  
17 indicates Pearson's coefficient of correlation) E) The decrease in synaptic density in the  
18 hippocampal CA1-region as assessed by VGLUT1 staining was ameliorated in treated  
19 PS2APP mice when compared to untreated mice ( $p = 0.0012$ ), whereas no such treatment  
20 effect was seen in wild-type animals ( $p = 0.810$ ; group effect:  $F_{(3,34)} = 12.03$ ;  $p < 0.0001$ ;  
21  $N=7-13$ ). F) VGLUT1 staining in the hippocampal CA1-region of representative untreated and  
22 treated PS2APP mice (left column) as well as of representative untreated and treated wild-  
23 type (WT) mice (right column). Statistics of group wise comparisons derive from one-way  
24 ANOVA with Bonferroni *hoc* correction: \*  $p < 0.05$ ; \*\*\*  $p < 0.005$ . Data are presented as  
25 mean  $\pm$  SEM.



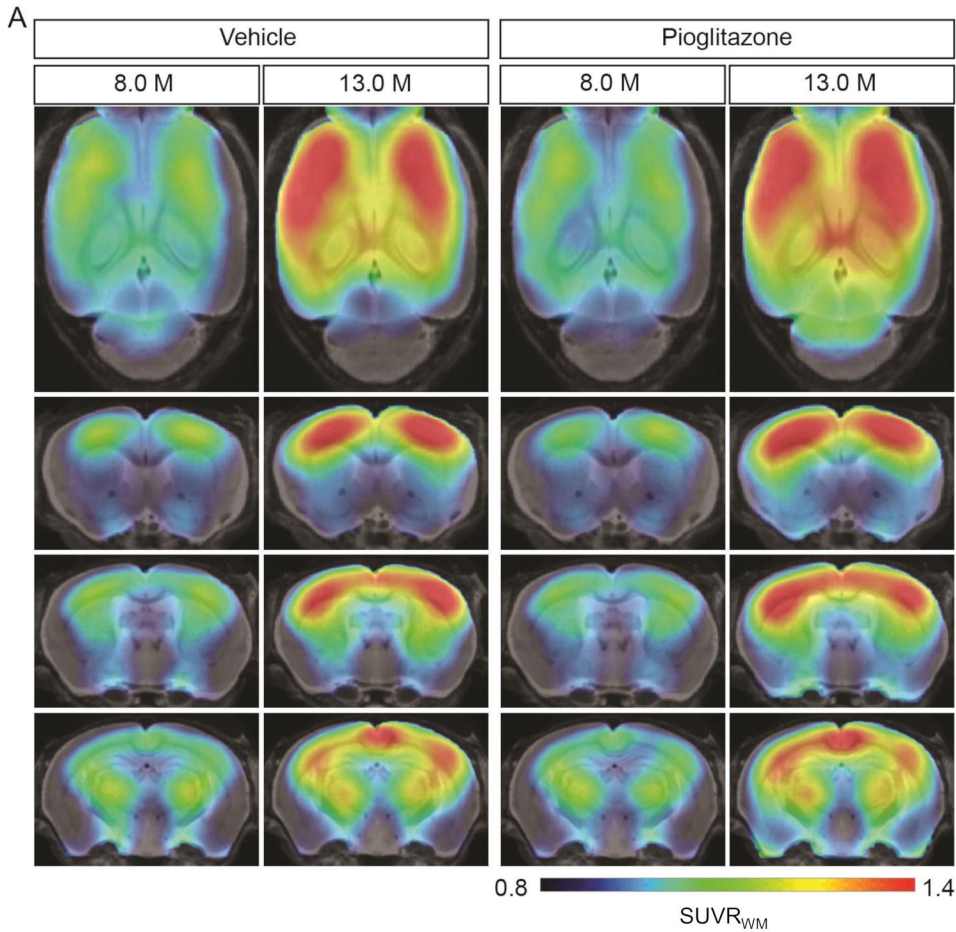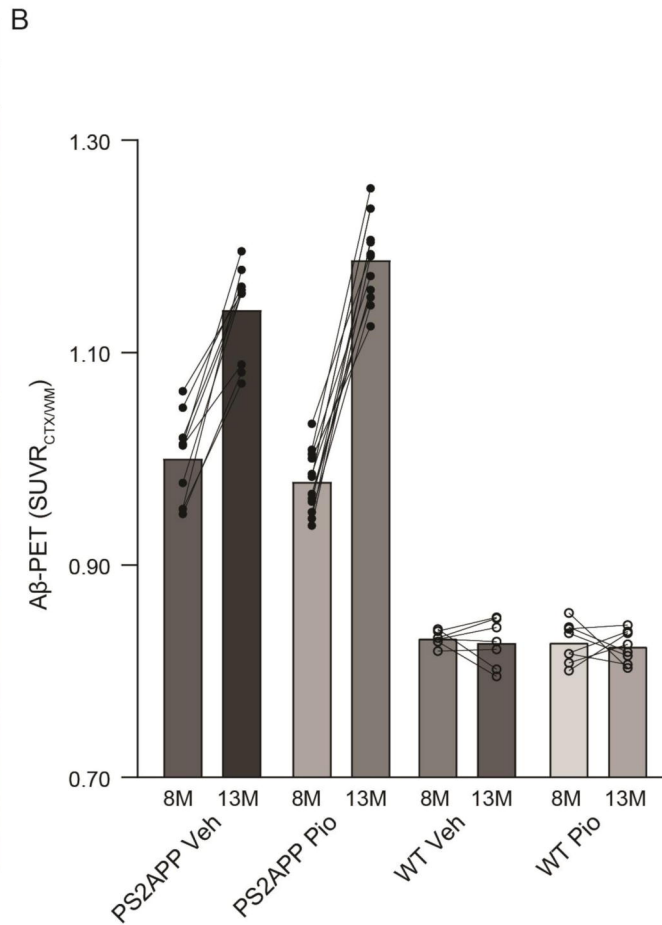

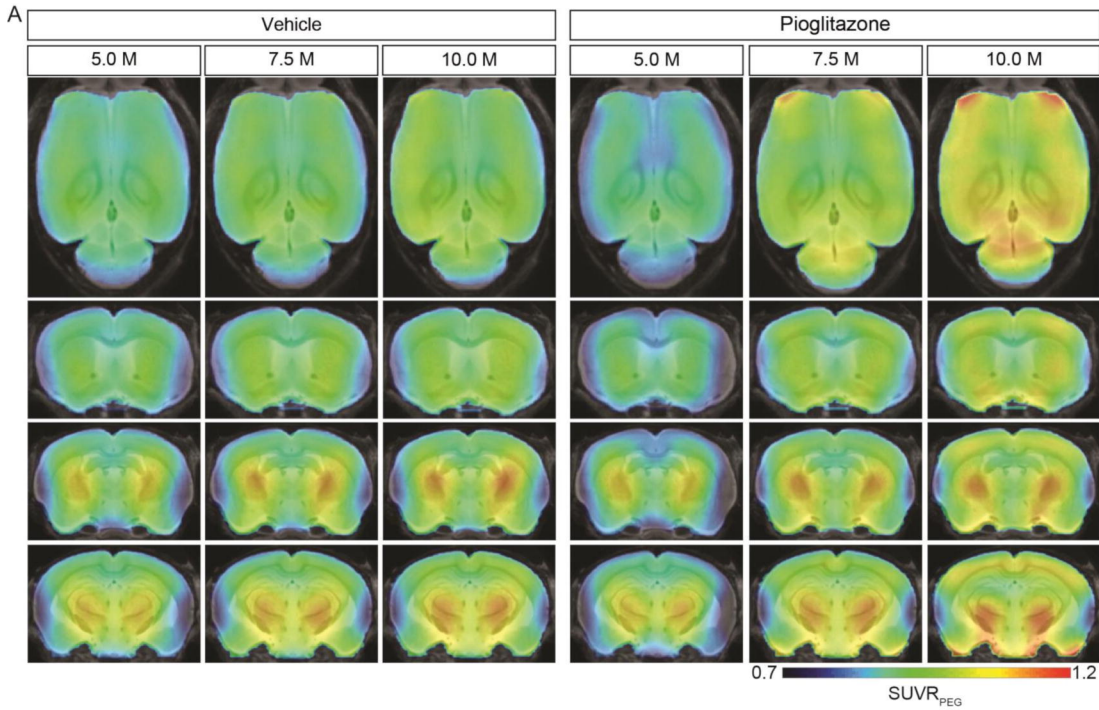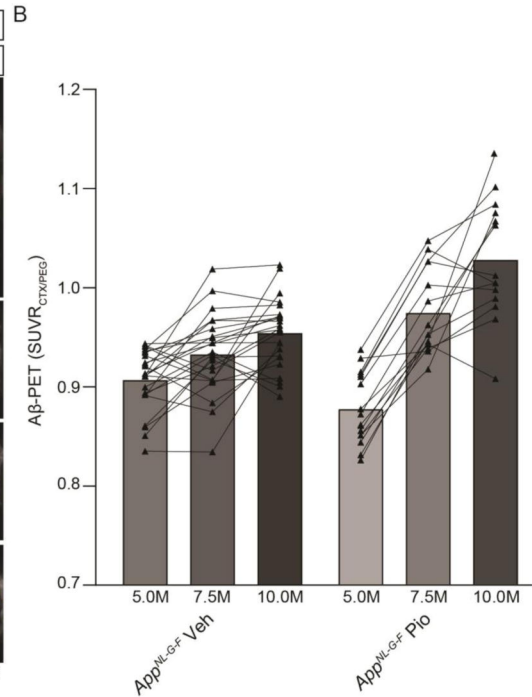

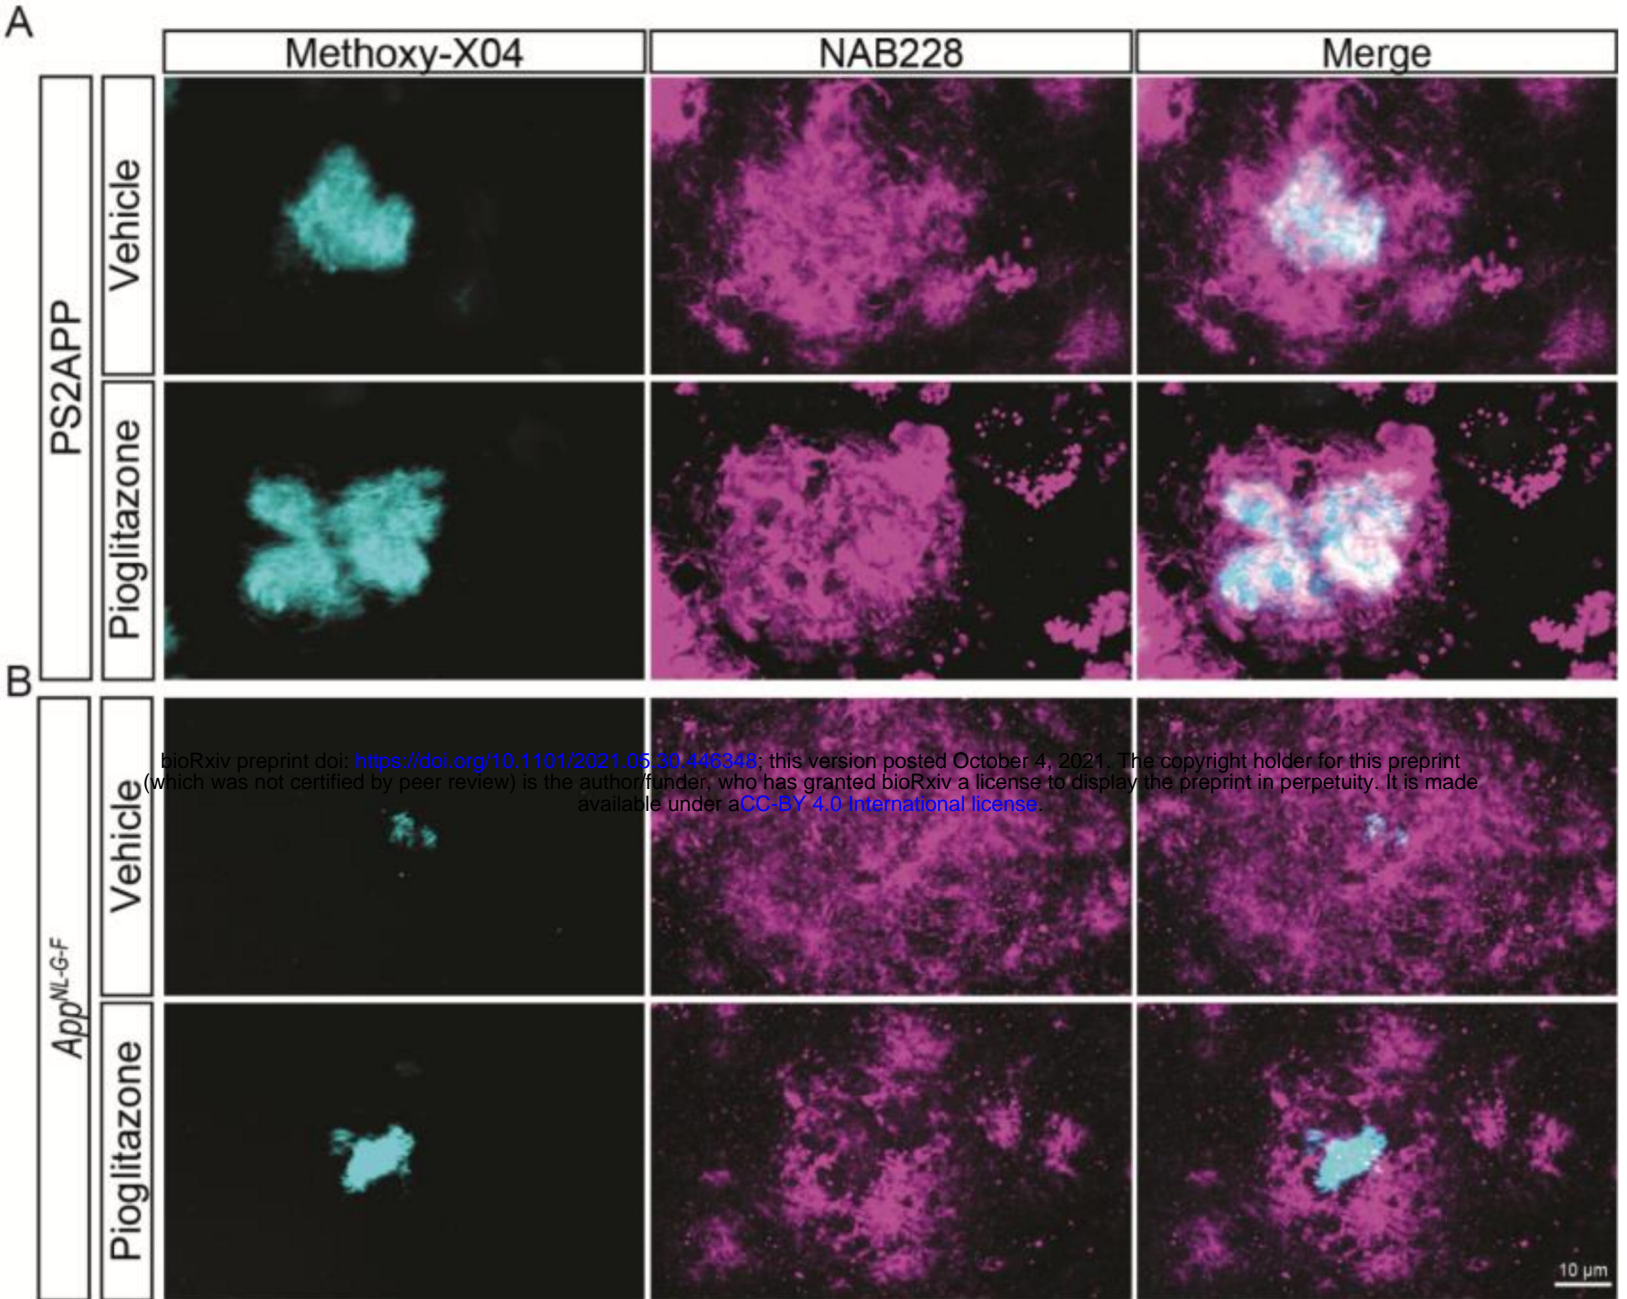

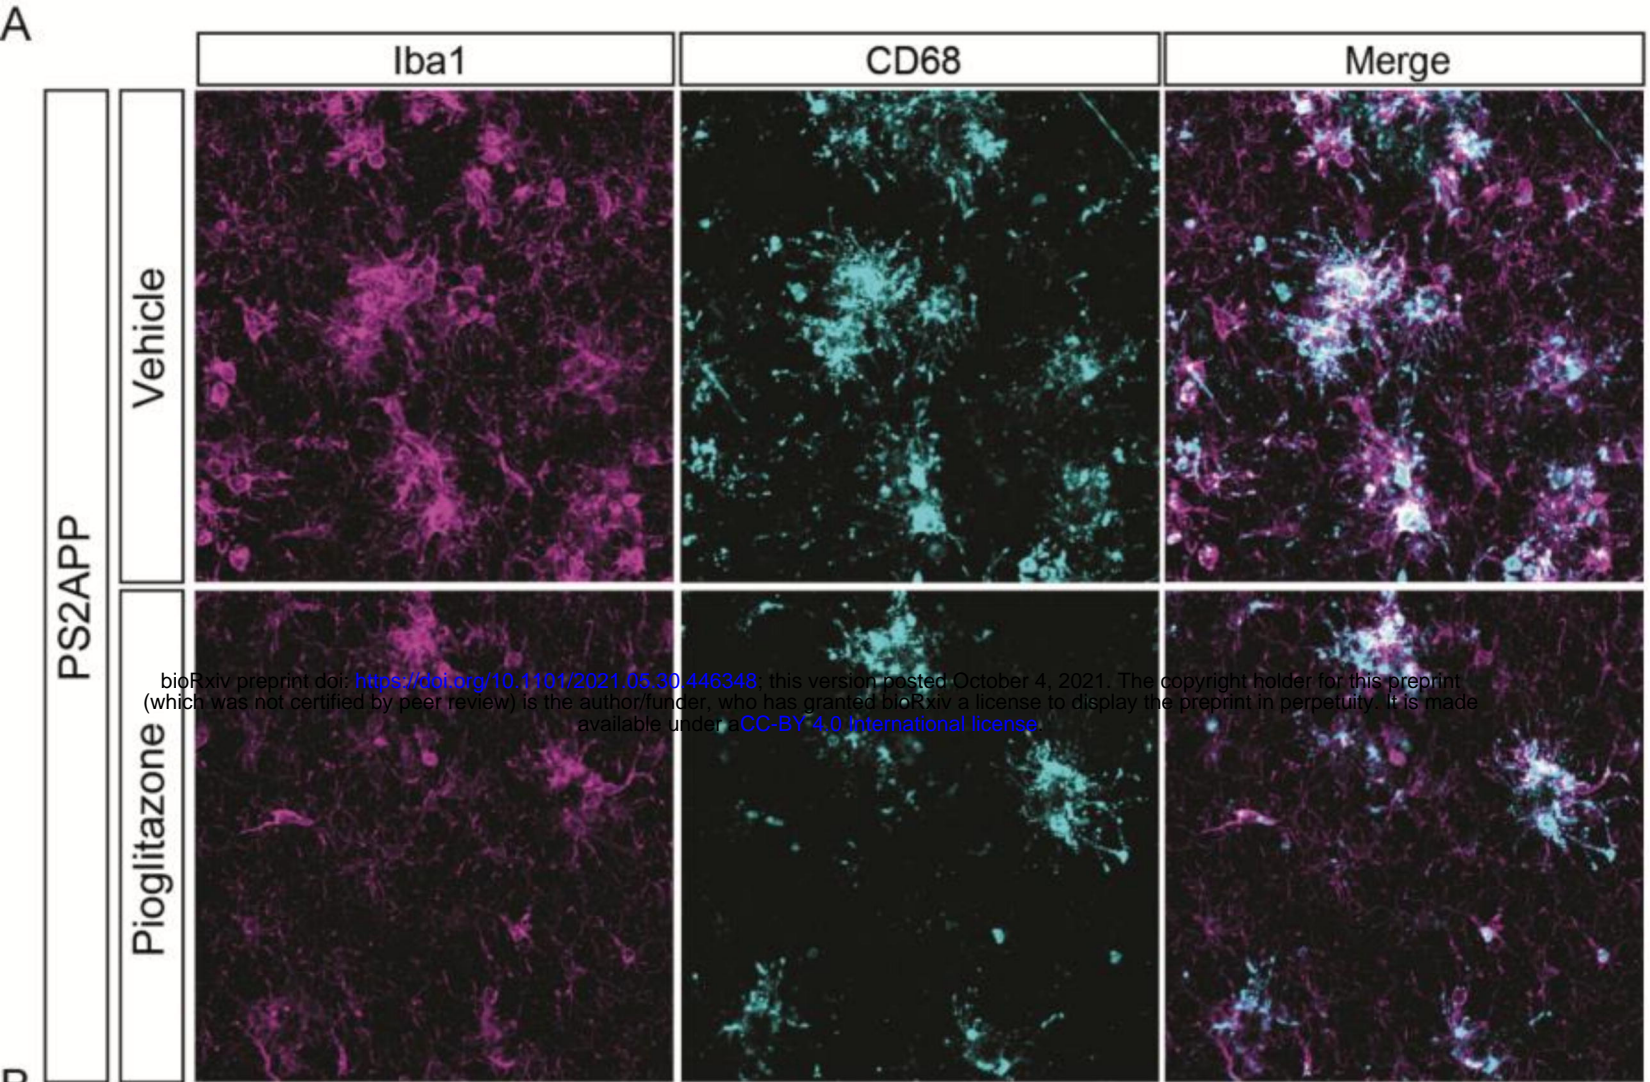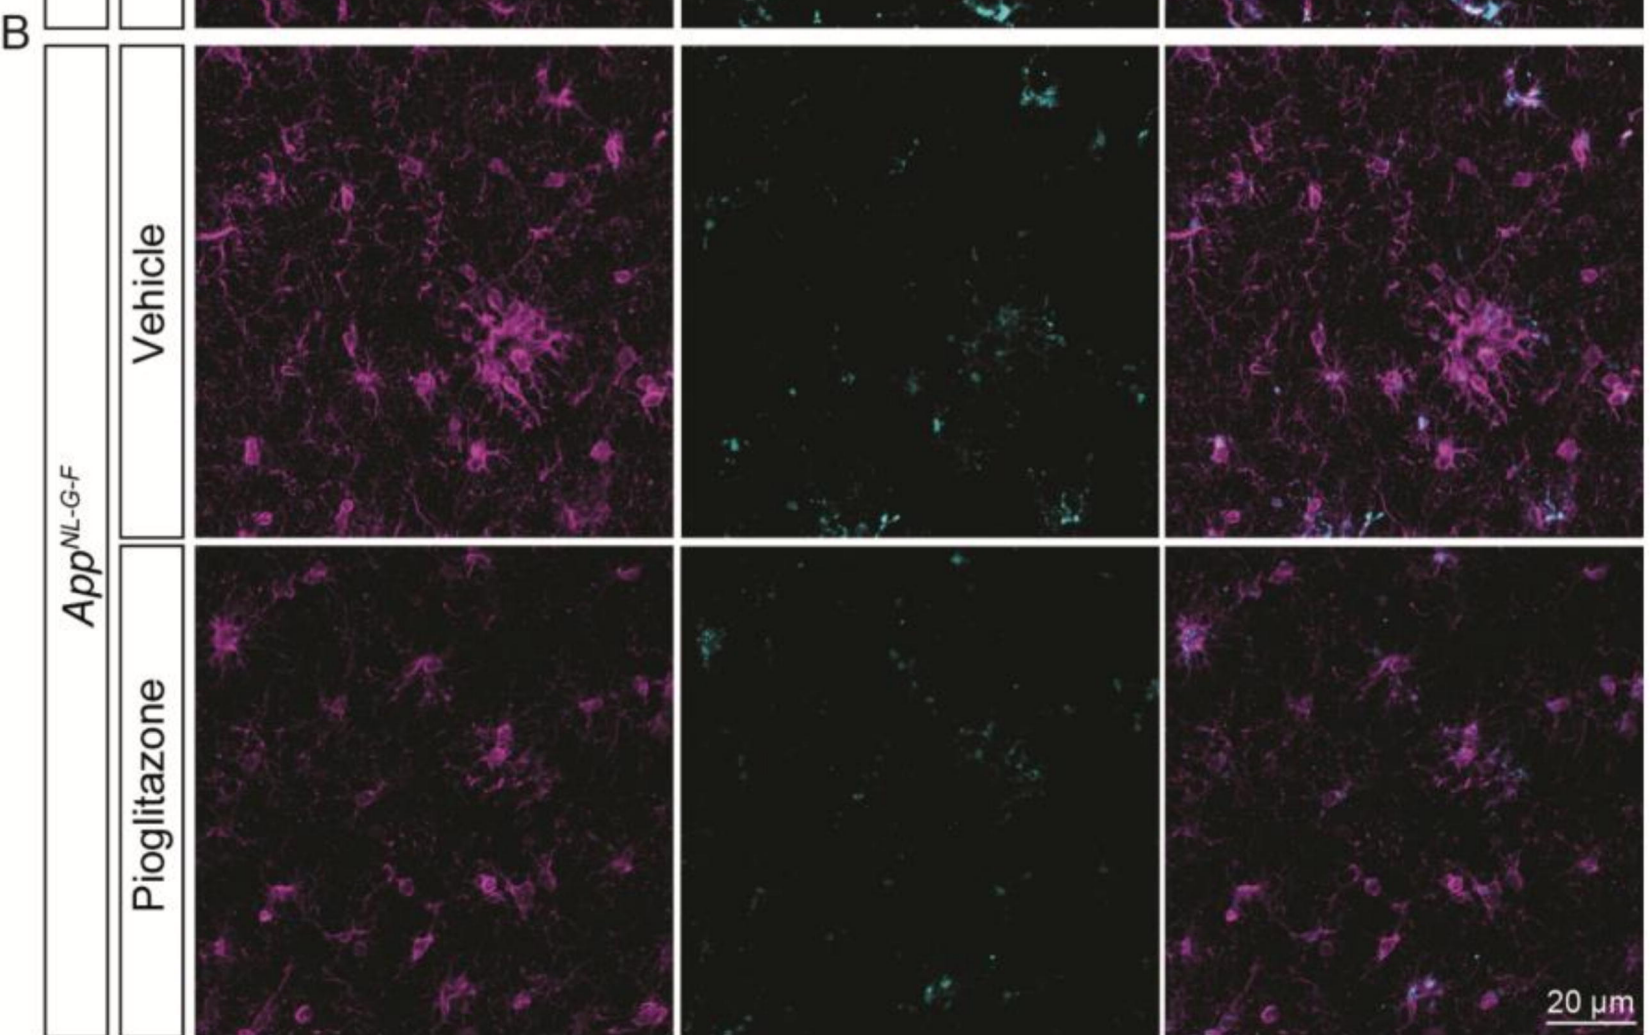

**C**

● PS2APP vehicle ● PS2APP pioglitazone ▲ *App*<sup>NL-G-F</sup> vehicle ▲ *App*<sup>NL-G-F</sup> pioglitazone

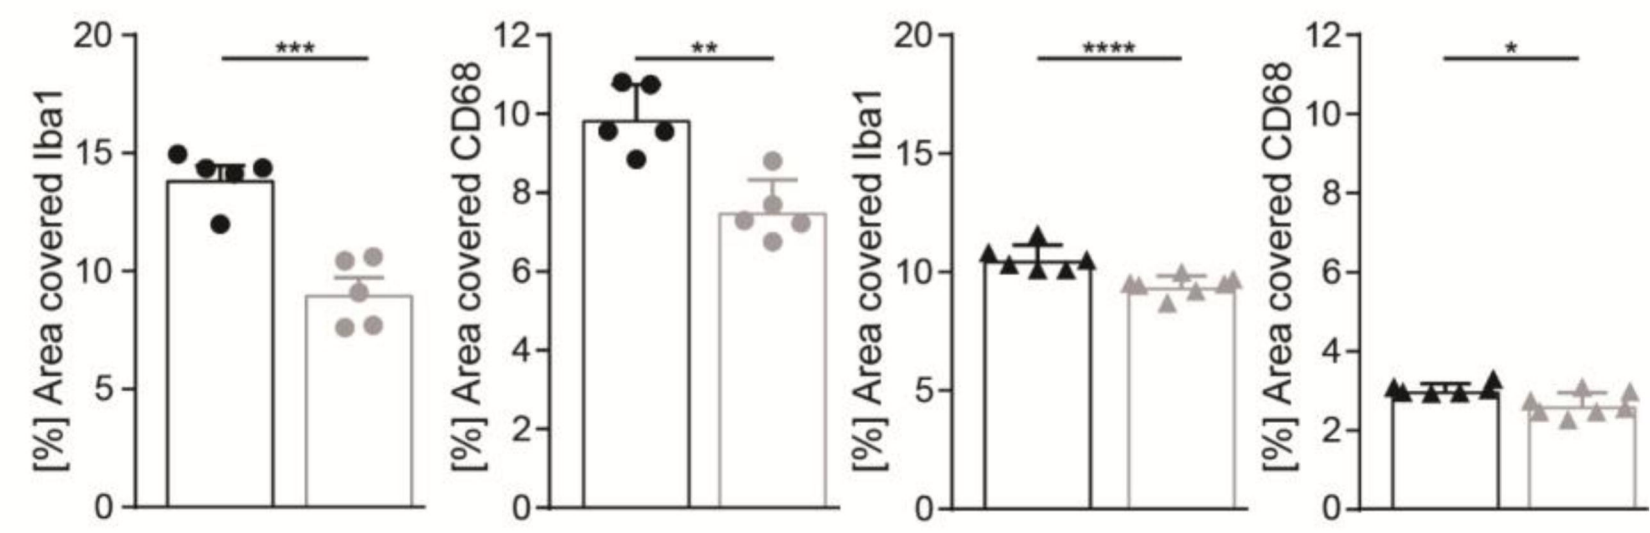

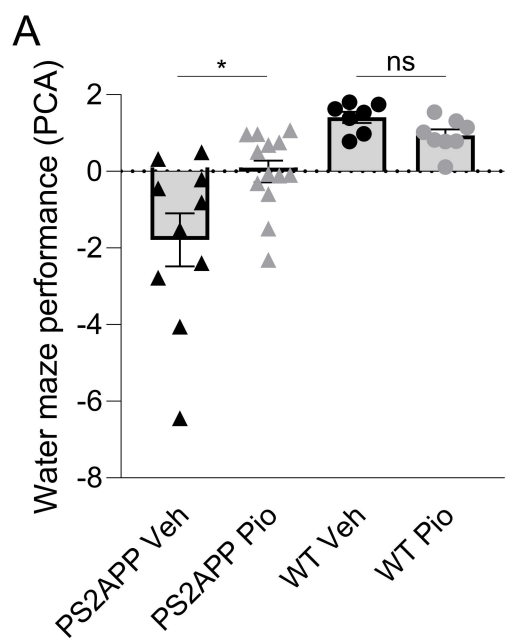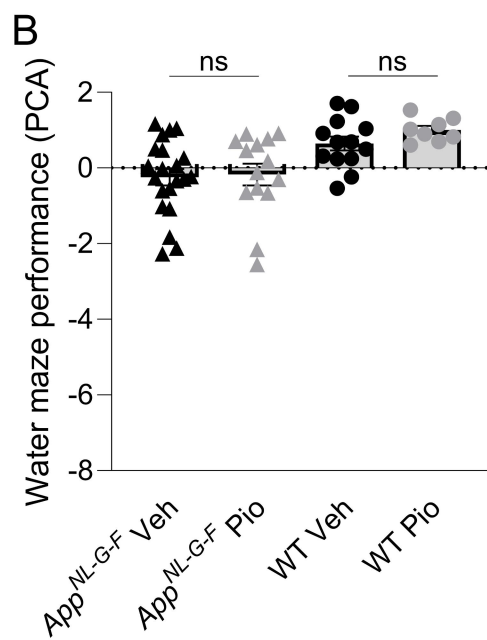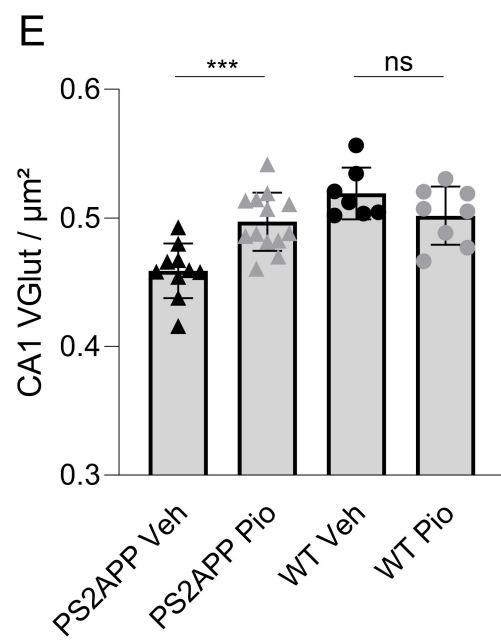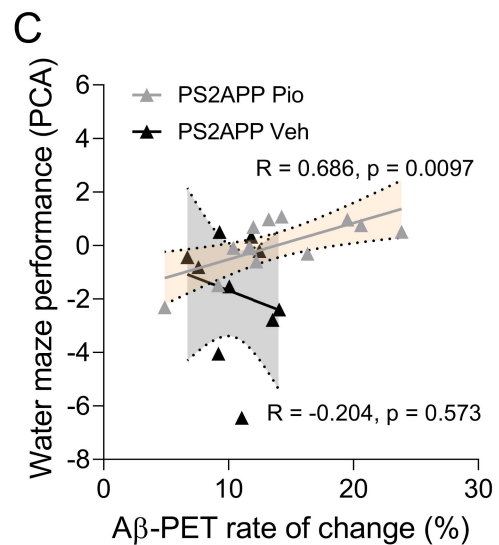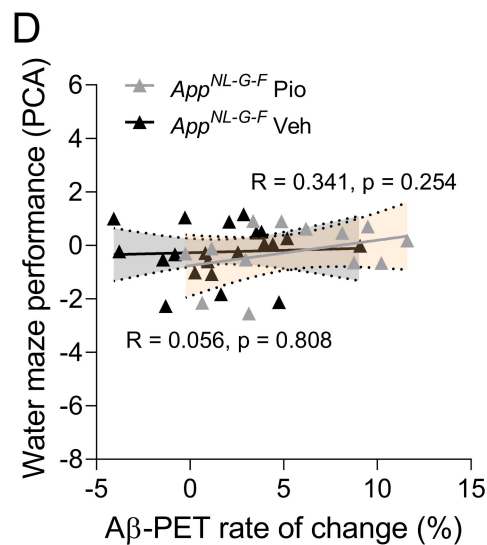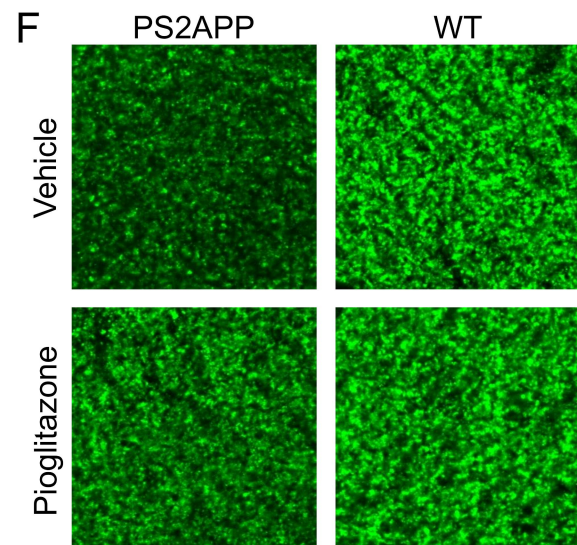

Source: https://www.biorxiv.org/content/10.1101/2021.05.30.446348v3.full.pdf
